# Supplementary material for: Occurrence of silesiaite, a new calcium–iron–tin sorosilicate in the calcic skarn of El Valle-Boinás, Asturias, Spain
Source: Copernicus journal article supplement (doi:10.5194/ejm-33-165-2021), 2021-04-19
Supplement: Supplementary file 1 [file ejm-33-165-2021-supplement.zip]

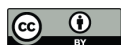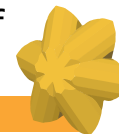

*Supplement of*

**Occurrence of silesiaite, a new calcium–iron–tin sorosilicate in the calcic skarn of El Valle-Boinás, Asturias, Spain**

**Antonia Cepedal et al.**

*Correspondence to:* Antonia Cepedal ([mcepedal@uniovi.es](mailto:mcepedal@uniovi.es))

- [ejm-33-165-2021-supplement-title-page.pdf](#)
- Supplementary material
  - [Table S1.xlsx](#)
  - [Table S2.xlsx](#)

The copyright of individual parts of the supplement might differ from the article licence.
