# Supplementary material for: Occurrence of silesiaite, a new calcium–iron–tin sorosilicate in the calcic skarn of El Valle-Boinás, Asturias, Spain
Source: Copernicus journal article supplement (doi:10.5194/ejm-33-165-2021), 2021-04-19
Supplement: Supplementary file 1 [file Table S1.xlsx]

## Sheet: Table S1
	Table S1. Electron microprobe analyses of silesiaite from El Valle-Boinás Cu-Au skarn.
			Sn-rich zones
	1	2	5	12	13	14	15	16	20	21	22	23	24	26	27	28	29	32	33	39	47	49	54	55	56	57	60
CaO	17.697	17.6247	17.639	17.5492	17.4479	17.4448	17.5936	17.6688	17.473	17.5266	17.7716	17.5599	17.6272	17.517	17.5403	17.3504	17.6341	17.5835	17.7107	17.7903	17.7354	17.8917	17.8176	17.8086	17.7007	17.6192	17.6335
TiO2																					0	0
Fe2O3	8.4693	8.6343	8.743	8.8185	8.5896	8.5109	9.3924	9.3611	8.6975	8.4961	8.8701	9.1787	9.0921	8.4825	8.898	8.4318	8.4883	8.7365	8.5925	9.3565	9.1176	9.5798	9.2738	9.0569	9.1531	8.6405	9.4027
MnO	0.0439	0.0423	0.0371	0.0694	0.049	0.0378			0.041		0.0455			0.0498	0.0402		0.0364	0.0395	0.0383		0	0	0.064	0.0583	0.0394		0.0492
SiO2	38.3875	37.9251	38.2788	37.8132	37.5664	37.8832	37.438	37.9768	37.7629	37.4822	37.5575	37.6179	37.8266	37.6525	38.0918	38.1789	38.1728	37.8701	37.9587	38.2098	37.9886	38.3525	38.0089	37.9629	38.2636	37.9005	37.8852
Al2O3	0.3232	0.3384	0.3908	0.353	0.3367	0.3024	0.2737	0.3405	0.3429	0.328	0.3449	0.2871	0.2942	0.3004	0.3656	0.2853	0.3169	0.2683	0.4198	0.5564	0.4158	0.3565	0.4816	0.3347	0.4372	0.2729	0.3206
CuO		0.0225					0.1678	0.1681	0.231	0.0379		0.0504	0.1176	0.1956	0.1465						0.0983	0.0544	0.1367	0.0287	0.1451	0.0303	0.2466
SnO2	33.5336	33.736	32.7908	32.801	33.1194	33.312	32.423	32.9059	33.3984	33.4461	33.0725	33.0682	32.972	33.5898	33.1526	33.883	33.5529	33.4147	32.95	32.2421	32.6147	32.3831	32.2365	32.8275	32.5095	33.69	32.7696
Total	98.4545	98.3233	97.8795	97.4043	97.109	97.4911	97.2885	98.4212	97.9467	97.3169	97.6621	97.7622	97.9297	97.7876	98.235	98.1294	98.2014	97.9126	97.67	98.1551	97.9704	98.618	98.0191	98.0776	98.2486	98.1534	98.3074
formula
Si	3.96189	3.92944	3.96023	3.93845	3.93514	3.95377	3.90303	3.91495	3.92536	3.92442	3.90673	3.91325	3.9229	3.925	3.93825	3.96856	3.9537	3.93661	3.94025	3.9277	3.92528	3.92818	3.91544	3.92297	3.93759	3.93461	3.90928
Al	0.0393252	0.0413354	0.0476655	0.0433455	0.0415807	0.0372078	0.0336396	0.0413821	0.0420212	0.0404867	0.0422959	0.0352098	0.03597	0.0369176	0.0445621	0.0349622	0.0386954	0.0328802	0.0513739	0.0674277	0.0506511	0.0430472	0.0584884	0.0407755	0.0530411	0.0334001	0.0390012
Ti
Fe	0.657872	0.673307	0.680776	0.691287	0.677197	0.668532	0.736965	0.7263	0.68044	0.669502	0.694428	0.71863	0.709669	0.665506	0.692382	0.659646	0.661686	0.683511	0.671296	0.723867	0.709054	0.738475	0.71901	0.704396	0.708916	0.675114	0.730233
Mg
Sn	1.38001	1.39376	1.3527	1.36225	1.38335	1.38629	1.34782	1.3526	1.38429	1.39632	1.37174	1.37165	1.36347	1.39618	1.36672	1.40436	1.3857	1.38501	1.36382	1.32153	1.34375	1.32253	1.32414	1.35264	1.33396	1.39459	1.3483
Mn	0.00383785	0.00371241	0.00325122	0.00612283	0.00434778	0.0033417	0	0	0.00361001	0	0.00400903	0	0	0.00439731	0.00352053	0	0.00319346	0.00347804	0.00336761	0	0	0	0.00558453	0.00510311	0.00343441	0	0.00430035
Ca	1.95707	1.95668	1.95538	1.95854	1.95838	1.95086	1.96534	1.95168	1.94615	1.96627	1.98079	1.95731	1.95879	1.95659	1.94313	1.93247	1.95703	1.95851	1.96989	1.95948	1.9636	1.96356	1.9667	1.97188	1.95177	1.95991	1.94967
Cu							0.0132109	0.0130866	0.0181334				0.00921022	0.0153981	0.0114383								0.0106345		0.0112763		0.0192165
	Table S1 (continuation). Electron microprobe analyses of silesiaite from El Valle-Boinás Cu-Au skarn.
			Fe-rich zones
	3	9	10	11	17	18	25	30	36	37	38	40	41	42	43	44	48	50	51	52	53	58	59
CaO	18.0105	18.2187	18.1119	18.2554	18.1536	18.3632	18.1778	18.2331	18.0014	18.0853	18.3494	18.2481	17.9125	18.1293	18.2292	18.2544	18.0142	18.1087	18.1469	18.3016	17.2694	18.3706	18.2946
TiO2		0.0686						0.0782			0.0946				0.101		0	0	0				0.0896
Fe2O3	10.6016	12.6807	11.1173	11.1829	11.2792	11.0542	10.3657	11.2585	10.1971	10.2204	11.811	10.4794	10.1081	10.8622	11.9053	10.5647	10.5949	11.355	10.7584	10.2306	11.4507	10.8383	11.4899
MnO			0.0375										0.0365	0.0361			0	0	0
SiO2	38.8991	39.2546	39.3336	39.1286	38.7248	38.4248	38.8676	38.8038	39.0602	39.1427	39.1166	39.0243	38.7255	38.9809	39.2297	39.58	39.1072	38.8694	38.5954	38.9476	36.9404	38.3801	38.7116
Al2O3	0.8542	0.5467	1.0663	1.0717	0.9937	1.3452	1.3045	0.98	1.3263	1.3481	0.8059	1.2364	1.2413	1.0525	0.6132	1.2435	0.7698	0.6511	0.9416	1.3272	0.4726	1.1481	0.9594
CuO							0.1036					0.1715	0.0358				0.029	0.0503	0.033	0.0309	0.0472	0.0454	0.1913
SnO2	28.9311	26.7377	27.9001	27.7055	27.9817	27.7552	28.3656	27.9225	28.6381	28.8792	27.2088	28.5739	28.3961	28.5922	27.208	28.134	29.6462	28.7761	29.3298	28.8613	25.8772	28.2603	27.4261
Total	97.2965	97.507	97.5667	97.3441	97.133	96.9426	97.1848	97.2761	97.2231	97.6757	97.3863	97.7336	96.4558	97.6532	97.2864	97.7766	98.1613	97.8106	97.8051	97.6992	92.0575	97.0428	97.1625
Formula
Si	3.95318	3.94135	3.95703	3.9416	3.92177	3.88749	3.93231	3.92145	3.95515	3.94793	3.93439	3.92969	3.95307	3.93478	3.95409	3.96916	3.95351	3.93122	3.91003	3.92647	3.94168	3.89261	3.90825
Al	0.102342	0.064713	0.126466	0.127274	0.118641	0.160447	0.155593	0.116758	0.158328	0.160298	0.0955619	0.146781	0.149383	0.12525	0.0728653	0.147013	0.091747	0.0776346	0.11246	0.157741	0.0594513	0.137278	0.11419
Ti
Fe	0.810887	0.958252	0.841756	0.847841	0.859713	0.841718	0.789296	0.856318	0.777119	0.775833	0.894097	0.794221	0.776584	0.825217	0.903136	0.797373	0.80613	0.864348	0.820303	0.776256	0.919589	0.827328	0.87305
Mg
Sn	1.17236	1.07045	1.11918	1.11284	1.12994	1.11967	1.1443	1.12516	1.15628	1.16143	1.09123	1.14731	1.15581	1.15081	1.09349	1.12498	1.19505	1.16049	1.18479	1.16018	1.101	1.14288	1.10406
Mn	0	0	0.00319556	0	0	0	0	0	0	0	0	0	0.00315603	0.00308665	0	0	0	0	0	0	0	0	0
Ca	1.96123	1.96005	1.95238	1.97044	1.96993	1.99067	1.97059	1.97436	1.95312	1.95451	1.97757	1.96895	1.95924	1.96085	1.96876	1.96148	1.95135	1.96246	1.96989	1.97699	1.97447	1.99642	1.97906
Cu							0.00791539					0.0130419											0.0145851
