# Supplementary material for: Occurrence of silesiaite, a new calcium–iron–tin sorosilicate in the calcic skarn of El Valle-Boinás, Asturias, Spain
Source: Copernicus journal article supplement (doi:10.5194/ejm-33-165-2021), 2021-04-19
Supplement: Supplementary file 2 [file Table S2.xlsx]

## Sheet: Raman spectra
Table S2. Raman spectra of silesiaite from El Valle-Boinás Cu-Au skarn, Spain
		Sn-rich zones						Fe-rich zones
S1		S2		S4			S3		S6			glass slide			kristiansenite RRUFFID=R090022
wawenumber (cm-1)	intensity	wawenumber (cm-1)	intensity	wawenumber (cm-1)	intensity		wawenumber (cm-1)	intensity	wawenumber (cm-1)	intensity		wawenumber (cm-1)	intensity		wawenumber (cm-1)	intensity
151.267	8891.24	151.267	13252.8	151.267	12705.8		151.267	12109.9	151.267	12592.3		151.267	15258.1		152.787	2898.81
153.017	9356.97	153.017	13869.6	153.017	13318.6		153.017	12516.1	153.017	13151.8		153.017	15182.6		154.715	3009.82
154.769	9500.76	154.769	14023.6	154.769	13298.6		154.769	12845.2	154.769	13217.5		154.769	15028.8		156.644	3097.59
156.52	9279.49	156.52	13582.1	156.52	13020.4		156.52	13514.6	156.52	13323.8		156.52	14803.3		158.572	3211.53
158.269	9185.13	158.269	13264.6	158.269	12689.8		158.269	13994.6	158.269	13590		158.269	14622.8		160.501	3333.78
160.02	8816.47	160.02	12674.1	160.02	12208.4		160.02	13785.1	160.02	13386.5		160.02	14640.6		162.429	3486.25
161.768	8572.1	161.768	12254.1	161.768	11935.9		161.768	13344.3	161.768	13088		161.768	14541.1		164.358	3685.81
163.518	8289.19	163.518	11952.6	163.518	11721.1		163.518	13143.6	163.518	12944.3		163.518	14289.8		166.286	3949.94
165.266	8329.79	165.266	11832.3	165.266	11853.4		165.266	13133.3	165.266	12889.3		165.266	14465.3		168.215	4219.97
167.013	8184.19	167.013	11499.6	167.013	11869.8		167.013	12920.6	167.013	12841		167.013	14259.1		170.143	4496.02
168.762	8091.01	168.762	11346.8	168.762	12040.5		168.762	12519.4	168.762	12866.3		168.762	14132.8		172.072	4781.07
170.509	8278.22	170.509	11488.6	170.509	12649.5		170.509	12331.4	170.509	13356.8		170.509	14222.3		174	5014
172.257	8441.26	172.257	11787.3	172.257	13152.3		172.257	12241.6	172.257	13947.3		172.257	14189.1		175.929	5194.39
174.003	8808.99	174.003	12118.8	174.003	13935.2		174.003	12919.9	174.003	14922.8		174.003	14225.1		177.857	5324.03
175.751	8864.69	175.751	12263.6	175.751	14355.7		175.751	14567.1	175.751	15687.3		175.751	14255.6		179.786	5413.63
177.497	8906.74	177.497	12445.6	177.497	14273		177.497	16489.3	177.497	16022.5		177.497	14181.8		181.714	5432.2
179.242	8862.42	179.242	12439.3	179.242	13783.3		179.242	17407.9	179.242	16044.3		179.242	13903.3		183.642	5444.59
180.989	8694.88	180.989	12393.3	180.989	13108.1		180.989	16580.4	180.989	15413		180.989	13918.6		185.571	5458.62
182.733	8792.1	182.733	12634.3	182.733	12717.9		182.733	15211.9	182.733	15136.3		182.733	13980.1		187.499	5475.88
184.479	8933.24	184.479	13118.6	184.479	12586.1		184.479	13786.4	184.479	14915.3		184.479	13728.6		189.428	5488.12
186.223	9211.06	186.223	13723.1	186.223	12657.6		186.223	13296.4	186.223	14903.5		186.223	13832.1		191.356	5514.84
187.967	9451.85	187.967	14072.6	187.967	12962.8		187.967	13496.6	187.967	14892.8		187.967	13834.1		193.285	5525.01
189.712	9548.13	189.712	14055.8	189.712	12929.8		189.712	13834.1	189.712	14980.8		189.712	13872.1		195.213	5486.8
191.455	9372.74	191.455	13871.8	191.455	13025.3		191.455	13984.6	191.455	15111.5		191.455	13721.3		197.142	5390.65
193.197	9389.17	193.197	13726.8	193.197	13515.2		193.197	13946.9	193.197	15360.8		193.197	13641.6		199.07	5260.5
194.942	9303.35	194.942	13513.8	194.942	14053.1		194.942	13579.8	194.942	15439		194.942	13555.1		200.999	5086.54
196.684	9680.47	196.684	13897.8	196.684	15158		196.684	13740.6	196.684	16265.5		196.684	13616.3		202.927	4875.27
198.425	10114.4	198.425	14441.8	198.425	16546.3		198.425	14573.9	198.425	17137.5		198.425	13477.8		204.856	4667.49
200.166	10729.9	200.166	15086.8	200.166	17801.7		200.166	15784.4	200.166	18160.5		200.166	13633.1		206.784	4442.79
201.91	10935.9	201.91	15193.6	201.91	17964.6		201.91	16499.3	201.91	18713.3		201.91	13610.6		208.713	4235.15
203.65	10853.2	203.65	14828.3	203.65	17187.8		203.65	16500.8	203.65	18765.5		203.65	13575.8		210.641	4077.44
205.39	10273.5	205.39	14153.8	205.39	15689.3		205.39	15480.9	205.39	17991.8		205.39	13542.1		212.569	3966.43
207.13	9687.54	207.13	13539.8	207.13	14320.6		207.13	14199.1	207.13	16862		207.13	13582.6		214.498	3899.1
208.872	9094.24	208.872	12889.3	208.872	13003.2		208.872	12859.4	208.872	15419.5		208.872	13539.8		216.426	3874.64
210.612	8716.74	210.612	12551.8	210.612	12117.7		210.612	12225.5	210.612	14567		210.612	13566.1		218.355	3896.85
212.351	8529.22	212.351	12344.8	212.351	11866.3		212.351	12074.3	212.351	13960.3		212.351	13516.3		220.283	3934.8
214.089	8527.44	214.089	12375.3	214.089	11830.1		214.089	12000.1	214.089	13559		214.089	13503.8		222.212	4009.81
215.828	8504.02	215.828	12359.3	215.828	11846.6		215.828	11883.9	215.828	13469		215.828	13746.6		224.14	4085.7
217.568	8448.22	217.568	12349.3	217.568	11669.7		217.568	11539.6	217.568	13178.5		217.568	13517.1		226.069	4137.05
219.306	8499.24	219.306	12401.1	219.306	11663.4		219.306	11392.2	219.306	13206.3		219.306	13655.1		227.997	4162.98
221.043	8520.79	221.043	12420.8	221.043	11382.9		221.043	11161.1	221.043	13272.3		221.043	13557.3		229.926	4161.83
222.78	8451.49	222.78	12313.8	222.78	11404		222.78	10875.6	222.78	13250.5		222.78	13646.8		231.854	4130.08
224.517	8479.01	224.517	12230.1	224.517	11457.8		224.517	10840.6	224.517	13331.8		224.517	13538.6		233.782	4066.11
226.254	8644.1	226.254	12381.3	226.254	11520.3		226.254	11018.4	226.254	13835.3		226.254	13598.3		235.711	3997.51
227.992	8787.26	227.992	12569.8	227.992	11809.6		227.992	11210.9	227.992	14244.3		227.992	13830.8		237.639	3911.52
229.728	8941.69	229.728	12662.3	229.728	11926.5		229.728	11370.1	229.728	14668		229.728	13819.6		239.568	3830.98
231.464	9068.74	231.464	12838.6	231.464	12215.3		231.464	11673.6	231.464	15020.5		231.464	13865.1		241.496	3769.85
233.199	9070.06	233.199	13066.8	233.199	11876.5		233.199	11303.4	233.199	15011.3		233.199	13710.1		243.425	3736.05
234.934	9260.85	234.934	13408.3	234.934	11691.2		234.934	11337.3	234.934	14827.3		234.934	13630.3		245.353	3715.83
236.669	9397.6	236.669	13766.1	236.669	11870.8		236.669	11787.1	236.669	14750.3		236.669	13718.3		247.282	3716.09
238.403	9516.18	238.403	13899.8	238.403	11935.8		238.403	12407.6	238.403	14719.5		238.403	13651.8		249.21	3731.75
240.137	9434.06	240.137	13937.1	240.137	11878.3		240.137	12710.4	240.137	14824.5		240.137	13732.3		251.139	3744.01
241.871	9060.35	241.871	13395.8	241.871	11564.6		241.871	12385.5	241.871	14667.3		241.871	13700.6		253.067	3759.95
243.604	8736.02	243.604	12937.8	243.604	10982.1		243.604	11746.4	243.604	14503		243.604	13591.1		254.996	3764.85
245.337	8566.26	245.337	12668.3	245.337	10799.6		245.337	11363.6	245.337	14509		245.337	13633.6		256.924	3749.09
247.07	8285.26	247.07	12352.6	247.07	10516.2		247.07	10989.3	247.07	14480.3		247.07	13534.3		258.853	3708.75
248.802	8252.99	248.802	12197.8	248.802	10319.4		248.802	10817.1	248.802	14480.5		248.802	13533.6		260.781	3653.25
250.534	8196.41	250.534	12172.6	250.534	10182.5		250.534	10712.1	250.534	14504.5		250.534	13390.1		262.71	3569.43
252.266	8177.44	252.266	12174.8	252.266	10175.8		252.266	10682.4	252.266	14748.5		252.266	13310.6		264.638	3468.35
253.998	8144.01	253.998	12169.3	253.998	10199.5		253.998	10623.1	253.998	14868.8		253.998	13228.8		266.567	3379.13
255.729	8088.1	255.729	12135.3	255.729	9982.4		255.729	10517.4	255.729	14779.3		255.729	13171.3		268.495	3295.83
257.46	8101.97	257.46	12162.8	257.46	9933.76		257.46	10383.4	257.46	14770.8		257.46	13172.3		270.423	3229.99
259.19	8066.69	259.19	11917.8	259.19	9795.26		259.19	10216.9	259.19	14469.3		259.19	13016.3		272.352	3190.74
260.921	7972.68	260.921	11903.1	260.921	9769.08		260.921	10120.1	260.921	14242.8		260.921	13048.8		274.28	3177.33
262.65	7904.22	262.65	11826.6	262.65	9748.83		262.65	10140.1	262.65	13930.3		262.65	12978.1		276.209	3183.65
264.38	7886.74	264.38	11747.6	264.38	9753.4		264.38	10100.4	264.38	13567.3		264.38	13004.1		278.137	3218.87
266.109	7787.99	266.109	11638.6	266.109	9584.01		266.109	9984.15	266.109	13120.5		266.109	13036.8		280.066	3272.69
267.836	7842.85	267.836	11549.3	267.836	9580.77		267.836	9907.09	267.836	12864.8		267.836	12977.3		281.994	3326.55
269.565	7804.52	269.565	11560.6	269.565	9693.8		269.565	9909.9	269.565	12670.8		269.565	12995.8		283.923	3389.68
271.293	7720.97	271.293	11425.6	271.293	9536.65		271.293	9641.15	271.293	12389.5		271.293	12906.1		285.851	3445.18
273.021	7747.19	273.021	11497.7	273.021	9559.51		273.021	9627.9	273.021	12118.8		273.021	12833.8		287.78	3489.3
274.749	7853.19	274.749	11553.6	274.749	9669.9		274.749	9794.9	274.749	12153.8		274.749	12938.1		289.708	3524.49
276.476	7833.79	276.476	11728.8	276.476	9718.52		276.476	9893.09	276.476	12015.8		276.476	12764.6		291.637	3539.02
278.204	7998.76	278.204	11886.1	278.204	10000.1		278.204	10202.1	278.204	12145		278.204	12970.3		293.565	3527.24
279.928	8261.22	279.928	12153.6	279.928	10273.3		279.928	10465.5	279.928	12267.5		279.928	12894.6		295.493	3496.35
281.655	8342.76	281.655	12372.6	281.655	10375.9		281.655	10656.6	281.655	12279.5		281.655	12941.6		297.422	3450.73
283.381	8513.24	283.381	12728.3	283.381	10506.7		283.381	10768.6	283.381	12483.8		283.381	13042.6		299.35	3381.93
285.107	8615.81	285.107	12824.5	285.107	10495.5		285.107	10654.4	285.107	12413.8		285.107	12840.8		301.279	3314.29
286.83	8707.63	286.83	12942.8	286.83	10632.4		286.83	10821.3	286.83	12578.3		286.83	13131.6		303.207	3252.88
288.555	8836.92	288.555	13115.3	288.555	10550.3		288.555	10992.4	288.555	12785.8		288.555	12999.1		305.136	3196.01
290.28	8983.24	290.28	13324.8	290.28	10435.7		290.28	11092.4	290.28	12910.8		290.28	13015.6		307.064	3157.46
292.005	9188.41	292.005	13564.3	292.005	10480.6		292.005	11332.6	292.005	13294.5		292.005	13073.8		308.993	3134.52
293.727	9338.92	293.727	13716.3	293.727	10674.3		293.727	11457.4	293.727	13517		293.727	13107.3		310.921	3130.43
295.451	9505.17	295.451	13956.8	295.451	10775.5		295.451	11330.3	295.451	13640.8		295.451	13147.6		312.85	3147.86
297.175	9926.6	297.175	14268.1	297.175	10972.3		297.175	11166.6	297.175	13554.5		297.175	13251.6		314.778	3185.9
298.898	10098.3	298.898	14669.1	298.898	11199.4		298.898	11123.4	298.898	13653		298.898	13326.8		316.707	3243.21
300.619	10362.2	300.619	15171.6	300.619	11348.7		300.619	11089.4	300.619	13671.8		300.619	13308.8		318.635	3316.09
302.342	10569.4	302.342	15605.3	302.342	11472.5		302.342	11316.9	302.342	13537.3		302.342	13329.6		320.564	3404.83
304.064	10874.5	304.064	16006.1	304.064	11596.8		304.064	11366.1	304.064	13523.3		304.064	13432.6		322.492	3515.28
305.784	10950.4	305.784	15990.3	305.784	11385		305.784	10935.6	305.784	13104.3		305.784	13345.3		324.421	3646.74
307.506	10982.4	307.506	15978.6	307.506	11332.9		307.506	10767.4	307.506	12984.3		307.506	13515.8		326.349	3797.54
309.225	10698.8	309.225	15425.1	309.225	11068.3		309.225	10420.6	309.225	12794.3		309.225	13474.6		328.277	3966.91
310.947	10285.9	310.947	14757.1	310.947	10904.1		310.947	10364.6	310.947	12705.8		310.947	13614.8		330.206	4157.25
312.668	9834.49	312.668	14203.3	312.668	10663.1		312.668	10297.9	312.668	12730.5		312.668	13604.3		332.134	4356.1
314.386	9549.67	314.386	14101.1	314.386	10673.6		314.386	10442.6	314.386	12783.8		314.386	13770.6		334.063	4574.62
316.106	9507.42	316.106	14006.6	316.106	10638.6		316.106	10373.4	316.106	12881		316.106	13801.8		335.991	4797.86
317.824	9439.6	317.824	14003.1	317.824	10509.3		317.824	10380.6	317.824	12817.8		317.824	13807.6		337.92	4998.52
319.544	9636.49	319.544	14336.1	319.544	10657.5		319.544	10484.9	319.544	13091.5		319.544	13831.6		339.848	5186.95
321.263	9808.52	321.263	14616	321.263	10746		321.263	10624.9	321.263	13214.5		321.263	13845.3		341.777	5342.19
322.98	9712.42	322.98	14562.6	322.98	10783.1		322.98	10735.6	322.98	13245.5		322.98	13912.3		343.705	5452.78
324.699	9765.6	324.699	14640.2	324.699	10864.1		324.699	10898.1	324.699	13391		324.699	13916.3		345.634	5514.06
326.415	9556.02	326.415	14326.3	326.415	10805.5		326.415	11006.1	326.415	13356.3		326.415	13918.3		347.562	5565.98
328.133	9481.13	328.133	14104.1	328.133	10895.3		328.133	11082.6	328.133	13483.3		328.133	14070.3		349.491	5591.29
329.849	9447.19	329.849	13933.6	329.849	10931.6		329.849	11252.6	329.849	13566.5		329.849	14045.8		351.419	5610.75
331.566	9421.02	331.566	13672.1	331.566	11039.8		331.566	11303.6	331.566	13642		331.566	14102.6		353.348	5656.63
333.281	9587.74	333.281	13677	333.281	11226.1		333.281	11537.4	333.281	13867.3		333.281	14191.6		355.276	5725.74
334.996	9661.49	334.996	13544.1	334.996	11359.6		334.996	11412	334.996	13844.3		334.996	14161.8		357.204	5818.08
336.712	9848.59	336.712	13412.8	336.712	11631.6		336.712	11379.1	336.712	13846.8		336.712	14217.8		359.133	5956.04
338.427	9953.01	338.427	13144.8	338.427	11776.1		338.427	11178.5	338.427	13861.3		338.427	14161.1		361.061	6128.29
340.142	10186.3	340.142	13269.3	340.142	12038.8		340.142	11279.4	340.142	13908.8		340.142	14325.1		362.99	6256.95
341.856	10189	341.856	13258.8	341.856	12187		341.856	11168	341.856	13860.5		341.856	14273.6		364.918	6371.31
343.571	10301.5	343.571	13360.8	343.571	12204.5		343.571	11196.4	343.571	13970.5		343.571	14277.3		366.847	6420.27
345.284	10208.4	345.284	13441.3	345.284	12180.6		345.284	11225.1	345.284	13942.8		345.284	14341.3		368.775	6363.96
346.997	10122.4	346.997	13517.1	346.997	12197.1		346.997	11393.1	346.997	13951.3		346.997	14387.3		370.704	6197.68
348.711	10057.7	348.711	13622.6	348.711	12206.3		348.711	11517.9	348.711	13890.3		348.711	14380.3		372.632	5961.1
350.423	9902.26	350.423	13657.8	350.423	12278.9		350.423	11558.1	350.423	14074.5		350.423	14336.8		374.561	5639.12
352.135	9710.92	352.135	13619.6	352.135	12553		352.135	11672.9	352.135	14075.5		352.135	14408.3		376.489	5254.53
353.848	9640.24	353.848	13630.3	353.848	12484.4		353.848	11415.1	353.848	14119.3		353.848	14392.6		378.418	4876.99
355.559	9711.06	355.559	13877.1	355.559	12635.5		355.559	11571.1	355.559	14459.8		355.559	14299.8		380.346	4499.61
357.27	9796.51	357.27	14132.3	357.27	13089.8		357.27	11743.6	357.27	14873.5		357.27	14339.8		382.274	4149.07
358.982	9924.35	358.982	14323	358.982	13556.5		358.982	11784.9	358.982	15211.3		358.982	14190.1		384.203	3834.24
360.692	10339.4	360.692	15019.1	360.692	14557.4		360.692	12400.9	360.692	16030		360.692	14314.1		386.131	3555.41
362.402	10671.8	362.402	15584.1	362.402	15372.5		362.402	12984.1	362.402	16749.8		362.402	14177.1		388.06	3317.89
364.114	11005.9	364.114	16317.8	364.114	16044.8		364.114	14115.6	364.114	17829.8		364.114	14321.6		389.988	3123.33
365.823	11041.8	365.823	16430.1	365.823	15778.8		365.823	15257.4	365.823	18471.3		365.823	14224.3		391.917	2962.55
367.532	10963.9	367.532	16401.6	367.532	15187.2		367.532	16780.2	367.532	18766.8		367.532	14051.3		393.845	2828.12
369.24	10723.2	369.24	16088.1	369.24	14475.3		369.24	17878.5	369.24	18822.8		369.24	14106.6		395.774	2718.08
370.951	10470	370.951	15839.1	370.951	13853.5		370.951	17813.8	370.951	18351		370.951	14179.8		397.702	2634.08
372.659	10072	372.659	15270.3	372.659	13069.6		372.659	16649.1	372.659	17465.5		372.659	14187.6		399.631	2571.53
374.366	9786.85	374.366	14790.1	374.366	12648.1		374.366	15372.1	374.366	16596.5		374.366	14355.1		401.559	2533.9
376.074	9333.02	376.074	14238.6	376.074	11921.6		376.074	14098.6	376.074	15546.8		376.074	14259.1		403.488	2530.45
377.781	9218.16	377.781	13947.2	377.781	11568		377.781	13095.4	377.781	14802.3		377.781	14348.8		405.416	2559.58
379.487	8992.51	379.487	13677.1	379.487	11223.6		379.487	12429.4	379.487	14295.5		379.487	14448.8		407.345	2615.51
381.196	8876.97	381.196	13438.6	381.196	10914.5		381.196	11881.8	381.196	13828.8		381.196	14536.8		409.273	2697.66
382.902	8745.02	382.902	13211.1	382.902	10829		382.902	11585.9	382.902	13552.3		382.902	14652.1		411.202	2804.7
384.608	8759.85	384.608	13261.8	384.608	10803.3		384.608	11434.9	384.608	13387		384.608	14866.8		413.13	2931.05
386.313	8723.01	386.313	13187.3	386.313	10737.5		386.313	11335.3	386.313	13318.3		386.313	15226.8		415.058	3082.64
388.019	8689.85	388.019	13086.3	388.019	10732.5		388.019	11244	388.019	13286.5		388.019	15277.1		416.987	3247.59
389.723	8722.44	389.723	13226.6	389.723	10723.2		389.723	11228.1	389.723	13252.8		389.723	15535.1		418.915	3421.98
391.428	8691.67	391.428	13196.1	391.428	10580		391.428	11174.1	391.428	13130.5		391.428	15387.3		420.844	3609.55
393.132	8749.66	393.132	13321.6	393.132	10690.1		393.132	11208.6	393.132	13223.3		393.132	15615.3		422.772	3785.53
394.836	8750.1	394.836	13286.6	394.836	10554.7		394.836	11088.9	394.836	13202.5		394.836	15495.1		424.701	3944.19
396.54	8690.76	396.54	13303.8	396.54	10475.4		396.54	10920.4	396.54	13049		396.54	15221.1		426.629	4089.22
398.243	8646.79	398.243	13217.6	398.243	10421.5		398.243	10902.6	398.243	12971.3		398.243	15176.1		428.558	4206.39
399.948	8721.51	399.948	13304.1	399.948	10344.3		399.948	10864.6	399.948	13026		399.948	15027.6		430.486	4286.05
401.651	8634.88	401.651	13304.6	401.651	10277.7		401.651	10845.4	401.651	12966.5		401.651	14852.8		432.415	4340.63
403.354	8688.13	403.354	13410.6	403.354	10348		403.354	10840.3	403.354	12929.8		403.354	14727.6		434.343	4370.44
405.056	8726.54	405.056	13405.6	405.056	10393.5		405.056	10856.6	405.056	12942.8		405.056	14646.6		436.272	4377
406.755	8871.22	406.755	13558.6	406.755	10458.6		406.755	11023.6	406.755	13056.8		406.755	14642.3		438.2	4385.88
408.457	8967.24	408.457	13760.8	408.457	10590.1		408.457	11161.6	408.457	13173		408.457	14545.6		440.128	4406.78
410.158	9102.44	410.158	13935.6	410.158	10697.4		410.158	11469.6	410.158	13273		410.158	14670.8		442.057	4438.32
411.859	9115.49	411.859	14041.8	411.859	10759		411.859	11608.9	411.859	13345.3		411.859	14789.8		443.985	4478.94
413.56	9039.95	413.56	13978.3	413.56	10733.1		413.56	11865	413.56	13367.5		413.56	14702.1		445.914	4532.29
415.26	8928.31	415.26	13783.3	415.26	10657.9		415.26	11909.6	415.26	13257.8		415.26	14726.6		447.842	4585.38
416.96	8946.99	416.96	13655.1	416.96	10747		416.96	12097.6	416.96	13292.5		416.96	14732.1		449.771	4637.13
418.66	8808.92	418.66	13584.1	418.66	10792.1		418.66	12106	418.66	13379.5		418.66	14659.6		451.699	4682.16
420.359	8877.02	420.359	13538.3	420.359	10862.7		420.359	12314.4	420.359	13422		420.359	14680.3		453.628	4712.62
422.058	9025.92	422.058	13596.1	422.058	11124.9		422.058	12524.1	422.058	13576.5		422.058	14640.3		455.556	4726.25
423.757	9137.63	423.757	13691.6	423.757	11245.3		423.757	12726.6	423.757	13782.8		423.757	14620.8		457.485	4724.44
425.453	9266.04	425.453	13818.3	425.453	11491		425.453	13048	425.453	13938.5		425.453	14678.1		459.413	4706.77
427.151	9274.47	427.151	13808.8	427.151	11459.9		427.151	13314.1	427.151	13972.3		427.151	14679.1		461.342	4671.64
428.849	9339.16	428.849	13918.8	428.849	11717.8		428.849	13327.1	428.849	14057		428.849	14722.6		463.27	4621.61
430.547	9329.67	430.547	14053.3	430.547	11723.4		430.547	13291.9	430.547	14113.8		430.547	14888.1		465.199	4547.14
432.244	9337.52	432.244	13981.8	432.244	11624.3		432.244	12880.1	432.244	13968.5		432.244	14771.8		467.127	4462.07
433.939	9357.01	433.939	14043.6	433.939	11597.8		433.939	12509.5	433.939	14001		433.939	14954.1		469.055	4384.31
435.635	9219.17	435.635	14017.6	435.635	11423.3		435.635	12262.9	435.635	13925		435.635	14957.3		470.984	4311.68
437.332	9178.7	437.332	13944.3	437.332	11110.1		437.332	12068.4	437.332	13905.3		437.332	14885.8		472.912	4258.5
439.028	9246.22	439.028	14166.7	439.028	11111		439.028	12149.6	439.028	13950.8		439.028	15016.6		474.841	4223.47
440.721	9143.94	440.721	14115.1	440.721	10969.6		440.721	11957.2	440.721	13976.8		440.721	14881.3		476.769	4214.41
442.417	9279.26	442.417	14291.7	442.417	10982.6		442.417	12045.1	442.417	14160		442.417	15030.3		478.698	4236.96
444.112	9380.22	444.112	14495.1	444.112	11095.4		444.112	12187.4	444.112	14322		444.112	14960.6		480.626	4298.12
445.807	9481.26	445.807	14726.7	445.807	11136		445.807	12149.4	445.807	14532.3		445.807	14961.8		482.555	4366.76
447.499	9579.56	447.499	14800.6	447.499	11236.6		447.499	12154.6	447.499	14609.8		447.499	14812.6		484.483	4449.99
449.193	9712.24	449.193	14980.3	449.193	11406.6		449.193	12130.5	449.193	14687.5		449.193	14828.1		486.412	4547.16
450.887	9813.29	450.887	15253.1	450.887	11478.8		450.887	12262.9	450.887	14731.5		450.887	14924.8		488.34	4610.96
452.579	9950.31	452.579	15291.6	452.579	11645.3		452.579	12298.7	452.579	14821.5		452.579	14849.6		490.269	4624.28
454.272	10008.5	454.272	15522.1	454.272	11812.7		454.272	12355.6	454.272	14874.8		454.272	14848.8		492.197	4600.76
455.963	10283.6	455.963	15819.3	455.963	12081.1		455.963	12640.6	455.963	15075		455.963	14889.6		494.126	4521.07
457.656	10473	457.656	16097.1	457.656	12313.4		457.656	12814.1	457.656	15141.8		457.656	14875.8		496.054	4380.19
459.348	10586.5	459.348	16297.8	459.348	12535.3		459.348	13011.4	459.348	15301.8		459.348	14877.1		497.983	4227.51
461.038	10525.5	461.038	16471.8	461.038	12653.6		461.038	13230.6	461.038	15334.8		461.038	14899.1		499.911	4089.56
462.73	10511	462.73	16252.1	462.73	12711.7		462.73	13203.4	462.73	15136.8		462.73	14886.3		501.839	3980.41
464.419	10451.9	464.419	16178.3	464.419	12715.8		464.419	13419.3	464.419	15270.3		464.419	15023.1		503.768	3926.73
466.11	10271.2	466.11	15905.1	466.11	12539.8		466.11	13555.3	466.11	14974.8		466.11	14889.1		505.696	3931.8
467.799	10123.9	467.799	15811	467.799	12472		467.799	13943.5	467.799	14945		467.799	14945.1		507.625	3991.49
469.49	10066.4	469.49	15527.3	469.49	12294.6		469.49	14330.6	469.49	14767.5		469.49	14918.3		509.553	4118.09
471.178	9882.19	471.178	15422.6	471.178	12265.6		471.178	14605.7	471.178	14635.5		471.178	14887.6		511.482	4295.17
472.868	9833.56	472.868	15347.1	472.868	12230.9		472.868	14391.6	472.868	14508		472.868	14884.6		513.41	4500.77
474.555	9874.49	474.555	15330.8	474.555	12243		474.555	14204.9	474.555	14417.3		474.555	14954.3		515.339	4733.67
476.245	9820.74	476.245	15369.6	476.245	12341.9		476.245	13826.7	476.245	14348		476.245	14811.6		517.267	4993.6
477.932	9934.51	477.932	15497.8	477.932	12468.8		477.932	13644.3	477.932	14389.8		477.932	14801.4		519.196	5268.35
479.62	9871.49	479.62	15417.2	479.62	12407.7		479.62	13391.3	479.62	14325.3		479.62	14807.6		521.124	5564.02
481.307	9812.52	481.307	15400.1	481.307	12288.5		481.307	13504.6	481.307	14373		481.307	14826.8		523.053	5893.17
482.995	9802.01	482.995	15306.8	482.995	12211.4		482.995	13685.9	482.995	14454.3		482.995	14672.6		524.981	6254.59
484.681	9976.02	484.681	15554	484.681	12413.6		484.681	14464.1	484.681	14917.3		484.681	14773.3		526.909	6654.12
486.366	10199.4	486.366	15842.6	486.366	12905.8		486.366	15390.4	486.366	15356.8		486.366	14726.8		528.838	7111.38
488.053	10640.7	488.053	16479.3	488.053	13564.1		488.053	16390.5	488.053	16117.3		488.053	14737.1		530.766	7641.44
489.738	11026.4	489.738	17200.6	489.738	14412.4		489.738	16840.1	489.738	17023		489.738	14783.1		532.695	8177.92
491.425	11126.3	491.425	17611.7	491.425	14661.8		491.425	16223.9	491.425	17358.8		491.425	14756.1		534.623	8747.81
493.109	10881.6	493.109	17211.8	493.109	14222		493.109	15090.1	493.109	17232.5		493.109	14798.3		536.552	9289.55
494.793	10296.9	494.793	16274.8	494.793	13196.9		494.793	13910.6	494.793	16419.5		494.793	14712.3		538.48	9739.57
496.479	9758.91	496.479	15432.8	496.479	12313		496.479	12980.4	496.479	15735.8		496.479	14726.6		540.409	10080.1
498.162	9284.1	498.162	14708.3	498.162	11523.6		498.162	12275.6	498.162	14893		498.162	14634.6		542.337	10279.9
499.845	9104.56	499.845	14334	499.845	11161.3		499.845	12016	499.845	14449.8		499.845	14765.8		544.266	10282
501.528	8978.38	501.528	14018.1	501.528	10901.5		501.528	11685.5	501.528	14177.5		501.528	14721.3		546.194	10107.3
503.212	8772.41	503.212	13790.3	503.212	10747.8		503.212	11423.6	503.212	13905.3		503.212	14539.8		548.123	9790.4
504.895	8727.52	504.895	13693	504.895	10565.9		504.895	11383.1	504.895	13705.3		504.895	14619.6		550.051	9356.67
506.576	8687.67	506.576	13696.8	506.576	10561.5		506.576	11355.1	506.576	13795.8		506.576	14528.1		551.98	8865.75
508.258	8711.49	508.258	13724.3	508.258	10536.5		508.258	11523.4	508.258	13932.5		508.258	14533.8		553.908	8368.24
509.941	8678.6	509.941	13688.5	509.941	10563.2		509.941	11571.3	509.941	14102.8		509.941	14593.1		555.837	7889.08
511.622	8718.31	511.622	13666.6	511.622	10480.8		511.622	11806.8	511.622	14123		511.622	14537.6		557.765	7457.21
513.303	8732.22	513.303	13769.8	513.303	10515.7		513.303	11986.3	513.303	14293.3		513.303	14626.8		559.693	7090.95
514.983	8795.04	514.983	13828.1	514.983	10564.3		514.983	12276.9	514.983	14439.8		514.983	14605.3		561.622	6776.08
516.663	8914.67	516.663	13900.8	516.663	10555.6		516.663	12794.6	516.663	14753		516.663	14695.8		563.55	6508.96
518.345	9076.93	518.345	14112	518.345	10810.9		518.345	13389.4	518.345	14984.5		518.345	14755.3		565.479	6289.73
520.025	9066.31	520.025	14155.7	520.025	10837.1		520.025	13662.4	520.025	15167.5		520.025	14762.1		567.407	6107.87
521.704	9196.44	521.704	14431.8	521.704	11002.4		521.704	14169.2	521.704	15382.3		521.704	14852.8		569.336	5949.13
523.383	9352.92	523.383	14723.6	523.383	11308.1		523.383	14801	523.383	15738.5		523.383	14872.1		571.264	5846.8
525.061	9487.52	525.061	14993.3	525.061	11551.1		525.061	15735	525.061	16018.3		525.061	15007.6		573.193	5810.64
526.739	9765.99	526.739	15297.6	526.739	11903.7		526.739	16650.6	526.739	16423.3		526.739	15148.6		575.121	5845.72
528.417	9912.18	528.417	15650.6	528.417	12364.5		528.417	17293.7	528.417	16720		528.417	15282.1		577.05	5971.45
530.095	10271.7	530.095	16093.1	530.095	12958.9		530.095	17668.5	530.095	17289.8		530.095	15305.8		578.978	6197.56
531.772	10691.1	531.772	16878.1	531.772	13768.9		531.772	17839	531.772	17966.8		531.772	15396.3		580.907	6495.69
533.449	11154	533.449	17569.8	533.449	14772.5		533.449	17902.6	533.449	18617.5		533.449	15671.1		582.835	6860.47
535.126	11892	535.126	18722.5	535.126	16264.1		535.126	17988.3	535.126	19578.5		535.126	15835.6		584.764	7302.03
536.803	12711.7	536.803	20068.1	536.803	18042.3		536.803	18409.9	536.803	20334.8		536.803	16021.1		586.692	7719.22
538.479	13701.5	538.479	21709.6	538.479	20262.7		538.479	18955.2	538.479	21168		538.479	16054.4		588.62	8046.98
540.155	14944.9	540.155	23654.5	540.155	22810.4		540.155	19912.1	540.155	22332		540.155	16284.8		590.549	8263.94
541.83	15901.4	541.83	25303.1	541.83	24786.4		541.83	20624.2	541.83	22988.3		541.83	16417.8		592.477	8356.13
543.505	16545.6	543.505	26568.8	543.505	25867.3		543.505	21327.1	543.505	23679.5		543.505	16571.1		594.406	8227.82
545.18	16614.3	545.18	26871.6	545.18	25766.5		545.18	21981.4	545.18	23721.5		545.18	16786.8		596.334	7938.49
546.855	16096	546.855	26000.8	546.855	24439.6		546.855	22351.6	546.855	23308		546.855	16775.8		598.263	7514.57
548.529	15395.7	548.529	24810.8	548.529	22945.3		548.529	22908.8	548.529	22875		548.529	17003.6		600.191	7013.01
550.203	14517.3	550.203	23477	550.203	21061.3		550.203	23273.6	550.203	22488		550.203	17061.8		602.12	6473.92
551.877	13622.3	551.877	22191.6	551.877	19101.5		551.877	22945.8	551.877	21807.7		551.877	17105.8		604.048	5945.76
553.551	12998	553.551	21352.7	553.551	17582.7		553.551	22127.6	553.551	21128.5		553.551	17319.1		605.977	5466.44
555.222	12421.4	555.222	20469	555.222	16321.6		555.222	20637.1	555.222	20324.3		555.222	17248.6		607.905	5042.21
556.895	12017.9	556.895	19759.3	556.895	15415		556.895	19203.4	556.895	19605.5		556.895	17273.3		609.834	4673.11
558.567	11613.9	558.567	19100.2	558.567	14734.3		558.567	17946.1	558.567	18967		558.567	17278.1		611.762	4362.42
560.24	11400.5	560.24	18617.6	560.24	14276.3		560.24	17057.9	560.24	18320.8		560.24	17360.6		613.691	4095.2
561.912	11080.5	561.912	18182.1	561.912	13925.9		561.912	16453.3	561.912	17837.3		561.912	17355.3		615.619	3858.15
563.583	10966.7	563.583	17797.8	563.583	13772.3		563.583	16022.2	563.583	17564.8		563.583	17443.1		617.548	3646.23
565.253	10873	565.253	17594.6	565.253	13781.1		565.253	15916.8	565.253	17294		565.253	17471.6		619.476	3453.56
566.924	10682.2	566.924	17356.8	566.924	13666.8		566.924	15721.2	566.924	16989.3		566.924	17330.8		621.404	3276.47
568.594	10685.2	568.594	17288.8	568.594	13804.9		568.594	15633.3	568.594	16930.5		568.594	17356.3		623.333	3109.38
570.265	10548	570.265	17209.1	570.265	13797.6		570.265	15551.2	570.265	16754		570.265	17377.6		625.261	2959.28
571.933	10536.2	571.933	17068.5	571.933	13578.1		571.933	15227.7	571.933	16697.8		571.933	17368.1		627.19	2832.38
573.603	10535.6	573.603	17104.1	573.603	13490		573.603	15070.6	573.603	16636.8		573.603	17286.8		629.118	2724.22
575.273	10564.5	575.273	17071.8	575.273	13480.7		575.273	15226.6	575.273	16760.3		575.273	17252.1		631.047	2629.5
576.94	10729.7	576.94	17208.1	576.94	13639.7		576.94	15538.4	576.94	17096		576.94	17127.6		632.975	2552.22
578.609	11010.2	578.609	17699.8	578.609	14001		578.609	16355.2	578.609	17530.3		578.609	17231.6		634.904	2489.35
580.278	11255.8	580.278	18109.3	580.278	14594.9		580.278	17261	580.278	18135		580.278	17047.1		636.832	2437.72
581.944	11700	581.944	18813.5	581.944	15526.5		581.944	18921.6	581.944	18789.8		581.944	17016.1		638.761	2396.24
583.612	12309.4	583.612	19544.7	583.612	16761.3		583.612	21107.9	583.612	19656.5		583.612	16844.1		640.689	2361.42
585.28	13304.4	585.28	20988.3	585.28	18475		585.28	24248	585.28	20978.5		585.28	16962.6		642.618	2333.87
586.945	13972.2	586.945	21915.1	586.945	20039.9		586.945	26654.7	586.945	21868.3		586.945	16822.1		644.546	2311.78
588.613	14456.7	588.613	22755.8	588.613	21128.3		588.613	27799.7	588.613	22667.5		588.613	16887.6		646.475	2292.65
590.277	14612.5	590.277	22994.2	590.277	21615.6		590.277	26588.2	590.277	22754.5		590.277	16755.3		648.403	2275.7
591.944	14113.9	591.944	22382.1	591.944	20719.6		591.944	24099.7	591.944	22270		591.944	16618.8		650.331	2265.01
593.608	13437	593.608	21379.3	593.608	19257.4		593.608	21691.4	593.608	21513.8		593.608	16596.8		652.26	2262.22
595.274	12508.2	595.274	20017.1	595.274	17400.8		595.274	19578.2	595.274	20351.5		595.274	16627.1		654.188	2262.43
596.938	11847.9	596.938	18994.6	596.938	15866		596.938	18180.1	596.938	19437.2		596.938	16592.6		656.117	2260.12
598.604	11224.2	598.604	17979.9	598.604	14636.6		598.604	16944.6	598.604	18426.5		598.604	16476.8		658.045	2256.62
600.267	10762.7	600.267	17318	600.267	13826.8		600.267	15908.6	600.267	17653		600.267	16492.1		659.974	2256.12
601.932	10436	601.932	16840.8	601.932	13186.7		601.932	15138.7	601.932	16915		601.932	16325.8		661.902	2258.59
603.594	10273.5	603.594	16360.3	603.594	12720.5		603.594	14510	603.594	16356.8		603.594	16384.6		663.831	2262.94
605.258	9947.74	605.258	15998.2	605.258	12212.2		605.258	13944.9	605.258	15913.3		605.258	16122.3		665.759	2269.43
606.92	9853.51	606.92	15795.1	606.92	12063		606.92	13698.4	606.92	15637.3		606.92	16218.1		667.688	2279.58
608.584	9663.44	608.584	15427.2	608.584	11752.7		608.584	13286.6	608.584	15164.3		608.584	15977.1		669.616	2291.02
610.245	9721.72	610.245	15430.5	610.245	11682.1		610.245	13184.3	610.245	15097.5		610.245	16124.1		671.545	2302.74
611.906	9477.74	611.906	15260.1	611.906	11425		611.906	12905.9	611.906	14856.5		611.906	15994.6		673.473	2315.01
613.569	9410.92	613.569	15030.2	613.569	11239		613.569	12663.7	613.569	14626		613.569	15915.3		675.402	2328.86
615.229	9274.1	615.229	14873.1	615.229	11122.8		615.229	12453.9	615.229	14464.8		615.229	15851.3		677.33	2344.29
616.89	9216.51	616.89	14799.7	616.89	10984.1		616.89	12299	616.89	14389.8		616.89	15779.6		679.258	2364.18
618.552	9094.22	618.552	14714.2	618.552	10840.4		618.552	12067.4	618.552	14160.8		618.552	15745.3		681.187	2390.99
620.211	9067.24	620.211	14585.1	620.211	10755.8		620.211	11941.4	620.211	14075.3		620.211	15691.3		683.115	2420.73
621.87	9013.01	621.87	14449.5	621.87	10612.8		621.87	11819.7	621.87	13983.5		621.87	15724.8		685.044	2449.1
623.531	8988.06	623.531	14399	623.531	10522.3		623.531	11579.2	623.531	13903.5		623.531	15686.6		686.972	2478.21
625.19	8946.42	625.19	14316.8	625.19	10442.1		625.19	11568.8	625.19	13881.3		625.19	15684.1		688.901	2514.87
626.848	8877.81	626.848	14240.3	626.848	10445.1		626.848	11590.8	626.848	13783		626.848	15797.8		690.829	2560.58
628.507	8929.99	628.507	14321.1	628.507	10400.4		628.507	11559.2	628.507	13808.3		628.507	15914.1		692.758	2609.8
630.166	8896.22	630.166	14285	630.166	10444.3		630.166	11498.4	630.166	13768.8		630.166	15959.6		694.686	2664.83
631.824	9016.02	631.824	14238.8	631.824	10530.3		631.824	11564.6	631.824	13834.5		631.824	16331.1		696.615	2727.94
633.481	9144.41	633.481	14456.1	633.481	10719.9		633.481	11743.8	633.481	14003.5		633.481	16951.6		698.543	2797.68
635.138	9495.01	635.138	14936.3	635.138	11306.7		635.138	12238.4	635.138	14457.8		635.138	18365.8		700.472	2872.36
636.795	9959.99	636.795	15471.6	636.795	12070.1		636.795	12967.7	636.795	15218		636.795	20321.9		702.4	2953.73
638.453	10047.1	638.453	15730.5	638.453	12347.6		638.453	13087	638.453	15434.5		638.453	21158.6		704.328	3039.99
640.109	9665.79	640.109	15133.5	640.109	11630.5		640.109	12497.4	640.109	14709.8		640.109	19650.8		706.257	3130.62
641.765	9209.38	641.765	14576.5	641.765	10991.4		641.765	11844.2	641.765	14094.3		641.765	17960.8		708.185	3231.94
643.42	8823.52	643.42	14161.7	643.42	10456.8		643.42	11324.1	643.42	13654		643.42	16712.8		710.114	3344.95
645.075	8712.52	645.075	13933.1	645.075	10118.7		645.075	11127.3	645.075	13402		645.075	16052.4		712.042	3470.1
646.73	8623.24	646.73	13764.7	646.73	10018.7		646.73	11038.1	646.73	13309.2		646.73	15806.1		713.971	3614.13
648.385	8608.56	648.385	13703.8	648.385	9973.8		648.385	10933.8	648.385	13081.8		648.385	15496.3		715.899	3776.19
650.039	8498.52	650.039	13598.5	650.039	9857.64		650.039	10750.5	650.039	13112.5		650.039	15395.8		717.828	3957.09
651.693	8519.67	651.693	13627.1	651.693	9822.9		651.693	10826.1	651.693	13045		651.693	15480.8		719.756	4159.69
653.347	8461.42	653.347	13531.1	653.347	9733.24		653.347	10753.3	653.347	13026		653.347	15462.6		721.685	4391.76
655	8519.51	655	13585.6	655	9822.55		655	10772	655	13048.5		655	15507.6		723.613	4622.09
656.653	8466.94	656.653	13560.1	656.653	9749.15		656.653	10729.7	656.653	13026.2		656.653	15555.6		725.542	4862.84
658.306	8422.02	658.306	13554.3	658.306	9721.55		658.306	10750.6	658.306	12984.5		658.306	15508.1		727.47	5077.03
659.959	8439.91	659.959	13594.2	659.959	9754.4		659.959	10794.7	659.959	13025.8		659.959	15504		729.399	5258.91
661.611	8432.31	661.611	13464.3	661.611	9742.33		661.611	10698.2	661.611	13043.8		661.611	15534.1		731.327	5380.34
663.263	8411.72	663.263	13422.9	663.263	9771.15		663.263	10679.6	663.263	12926.3		663.263	15694.8		733.255	5418
664.914	8491.01	664.914	13581.1	664.914	9831.96		664.914	10838.4	664.914	13099.5		664.914	15963.8		735.184	5352.76
666.566	8493.31	666.566	13600.1	666.566	9807.99		666.566	10846.2	666.566	13101.8		666.566	16215.3		737.112	5197.85
668.217	8454.52	668.217	13670.6	668.217	9887.05		668.217	10956.7	668.217	13226.8		668.217	16604.5		739.041	4944.36
669.868	8581.35	669.868	13575.8	669.868	9880.24		669.868	10895.7	669.868	13225.8		669.868	16547.6		740.969	4625.99
671.518	8522.17	671.518	13616.9	671.518	9904.26		671.518	10838.3	671.518	13156.5		671.518	16646.3		742.898	4311.85
673.168	8440.52	673.168	13399.2	673.168	9791.83		673.168	10813.3	673.168	13069.5		673.168	16349.1		744.826	3996.12
674.816	8343.76	674.816	13360.1	674.816	9655.81		674.816	10627.7	674.816	12856.3		674.816	15859.3		746.755	3714.12
676.466	8240.09	676.466	13144.3	676.466	9520.49		676.466	10479	676.466	12758.5		676.466	15477.6		748.683	3482.48
678.115	8303.16	678.115	13176.3	678.115	9563.72		678.115	10398.1	678.115	12706.8		678.115	15226.6		750.612	3290.69
679.764	8160.47	679.764	12928.6	679.764	9421.33		679.764	10222.9	679.764	12601.8		679.764	14984.3		752.54	3133.63
681.413	8174.26	681.413	12947.7	681.413	9437.05		681.413	10308.8	681.413	12543.2		681.413	15042.6		754.469	3026.65
683.059	8224.97	683.059	13007.4	683.059	9428.15		683.059	10273.4	683.059	12692		683.059	15068.4		756.397	2940.57
684.707	8102.04	684.707	12924.6	684.707	9359.31		684.707	10238.7	684.707	12542		684.707	14926.1		758.326	2867.87
686.355	8122.1	686.355	12864	686.355	9332.55		686.355	10118.7	686.355	12456		686.355	14774.3		760.254	2804.11
688.003	8022.81	688.003	12710.5	688.003	9242.68		688.003	10084	688.003	12324.3		688.003	14628.3		762.183	2750
689.648	8058.76	689.648	12741.2	689.648	9265.3		689.648	10087.8	689.648	12370.8		689.648	14504.6		764.111	2707.3
691.295	8023.49	691.295	12686.3	691.295	9211.99		691.295	10035.6	691.295	12254.2		691.295	14439.1		766.039	2672.84
692.942	8037.45	692.942	12689.8	692.942	9220.05		692.942	9949	692.942	12233		692.942	14430.6		767.968	2645.07
694.586	7963.67	694.586	12505.2	694.586	9181.87		694.586	9862.34	694.586	12186.8		694.586	14197.3		769.896	2621.05
696.232	8019.92	696.232	12626.6	696.232	9193.83		696.232	9903.71	696.232	12138.3		696.232	14186.6		771.825	2601.62
697.878	7925.6	697.878	12482.3	697.878	9101.08		697.878	9787.4	697.878	12116.5		697.878	13959.8		773.753	2588.23
699.521	7966.74	699.521	12500.1	699.521	9075.05		699.521	9827.69	699.521	12157.7		699.521	13974.4		775.682	2580.21
701.167	7896.85	701.167	12405.8	701.167	9084.12		701.167	9711.25	701.167	12054.3		701.167	13793.1		777.61	2576.39
702.81	7872.88	702.81	12371.6	702.81	9068.58		702.81	9689.14	702.81	12007.3		702.81	13639.8		779.539	2578.69
704.454	7892.47	704.454	12387.3	704.454	9011.3		704.454	9735.11	704.454	12011.5		704.454	13481.8		781.467	2581.42
706.099	7892.97	706.099	12404.3	706.099	9049.03		706.099	9636.86	706.099	12027		706.099	13458.9		783.396	2582.97
707.741	7935.41	707.741	12276.6	707.741	9052.65		707.741	9651.5	707.741	11972.8		707.741	13360.3		785.324	2586.93
709.384	7909.22	709.384	12334.4	709.384	9079.12		709.384	9637	709.384	11950.8		709.384	13322.4		787.253	2596.47
711.026	7926.74	711.026	12303.7	711.026	9105.08		711.026	9653.25	711.026	11907.3		711.026	13283.6		789.181	2611.17
712.669	7907.34	712.669	12305.2	712.669	9125.49		712.669	9670.25	712.669	11991		712.669	13175.3		791.11	2626.37
714.31	7937.43	714.31	12377.3	714.31	9227.46		714.31	9681.69	714.31	12053.3		714.31	13187.6		793.038	2641.2
715.953	8007.72	715.953	12387.3	715.953	9249.14		715.953	9759.54	715.953	12061.5		715.953	13184.4		794.966	2655.54
717.593	8061.43	717.593	12463.3	717.593	9379.8		717.593	9865.84	717.593	12141.8		717.593	13287.1		796.895	2669.86
719.233	8091.31	719.233	12542.6	719.233	9367.05		719.233	9900.44	719.233	12189.8		719.233	13273.3		798.823	2685.72
720.875	8155.74	720.875	12501.4	720.875	9541.65		720.875	10003.4	720.875	12275.8		720.875	13371.8		800.752	2702.72
722.514	8270.17	722.514	12654.1	722.514	9673.21		722.514	10223.3	722.514	12492.8		722.514	13408.3		802.68	2720.64
724.155	8318.95	724.155	12780.9	724.155	9829.08		724.155	10353.4	724.155	12563		724.155	13541.9		804.609	2739.6
725.794	8471.47	725.794	13028.4	725.794	10127.5		725.794	10698.4	725.794	12752.5		725.794	13824.8		806.537	2760.03
727.433	8593.63	727.433	13199.7	727.433	10470.2		727.433	10886.2	727.433	12977.3		727.433	13985.9		808.466	2782.05
729.073	8876.6	729.073	13400.5	729.073	10675.4		729.073	11297.3	729.073	13125.3		729.073	14008.8		810.394	2806.85
730.711	8999.13	730.711	13699.2	730.711	11018.4		730.711	11955.8	730.711	13463.3		730.711	14374.3		812.323	2834.77
732.349	9216.31	732.349	13940.1	732.349	11315.8		732.349	12690.5	732.349	13863.5		732.349	14941.1		814.251	2865.87
733.988	9348.54	733.988	13946.9	733.988	11376		733.988	13378	733.988	14170		733.988	15370.6		816.18	2899.36
735.625	9163.29	735.625	13910.9	735.625	11077.7		735.625	13376	735.625	14195.8		735.625	15656.3		818.108	2934.6
737.262	8925.18	737.262	13616.4	737.262	10617.9		737.262	12888.6	737.262	13865.5		737.262	15340.4		820.037	2975.36
738.899	8632.26	738.899	13281.6	738.899	10168.6		738.899	12148.5	738.899	13433		738.899	14866.8		821.965	3021.64
740.537	8500.97	740.537	13078.9	740.537	9925.22		740.537	11583.4	740.537	13243.2		740.537	14643		823.893	3072.76
742.173	8323.92	742.173	12980.6	742.173	9779.3		742.173	11127.7	742.173	13088		742.173	14689.6		825.822	3129.63
743.809	8415.45	743.809	12932.4	743.809	9699.33		743.809	11006.5	743.809	12980.5		743.809	14765.5		827.75	3192.7
745.444	8316.18	745.444	12939.1	745.444	9629.58		745.444	10840.8	745.444	12842		745.444	15011.5		829.679	3255.5
747.079	8251.42	747.079	12984	747.079	9556.08		747.079	10595.9	747.079	12822.3		747.079	15196.6		831.607	3319.97
748.716	8342.92	748.716	13107.9	748.716	9711.39		748.716	10650.1	748.716	12897.8		748.716	15380.6		833.536	3380.13
750.35	8319.04	750.35	13102	750.35	9577.74		750.35	10558.9	750.35	12768.8		750.35	15493		835.464	3438.66
751.985	8336.31	751.985	13099.3	751.985	9613.4		751.985	10524.7	751.985	12858.3		751.985	15688.1		837.393	3495.75
753.619	8365.81	753.619	13132.6	753.619	9692.78		753.619	10488.1	753.619	12799		753.619	15723.1		839.321	3533.62
755.252	8356.99	755.252	13066.6	755.252	9710.33		755.252	10481	755.252	12820.5		755.252	15674.3		841.25	3545.12
756.886	8289.45	756.886	13061	756.886	9636.64		756.886	10346.9	756.886	12715.8		756.886	15504.8		843.178	3546.04
758.519	8300.52	758.519	12950.3	758.519	9609.33		758.519	10363.9	758.519	12789.3		758.519	15370.8		845.107	3541.97
760.152	8208.01	760.152	12932.6	760.152	9569.05		760.152	10181.6	760.152	12605.5		760.152	15077.3		847.035	3534.29
761.784	8297.04	761.784	12910.4	761.784	9540.4		761.784	10192.4	761.784	12586.8		761.784	14977.1		848.963	3525.07
763.416	8243.41	763.416	12795.3	763.416	9416.99		763.416	10062.3	763.416	12385		763.416	14817		850.892	3509.5
765.048	8258.7	765.048	12884.2	765.048	9477.22		765.048	10139.9	765.048	12581.5		765.048	14813.1		852.82	3497.58
766.68	8229.17	766.68	12845	766.68	9463.72		766.68	10025.4	766.68	12509.5		766.68	14698.1		854.749	3492.06
768.311	8251.17	768.311	12922	768.311	9459.3		768.311	10160.2	768.311	12515.7		768.311	14633.3		856.677	3492.57
769.942	8265.92	769.942	12868.8	769.942	9506.58		769.942	10113.9	769.942	12512		769.942	14691.6		858.606	3498.56
771.573	8267.04	771.573	12905.7	771.573	9512.56		771.573	10078.4	771.573	12517.5		771.573	14594.4		860.534	3508.82
773.204	8289.79	773.204	12806.8	773.204	9539.37		773.204	10064.7	773.204	12449.5		773.204	14536.6		862.463	3524.88
774.834	8339.26	774.834	12981.2	774.834	9602.05		774.834	10182	774.834	12611		774.834	14701		864.391	3548.71
776.464	8277.92	776.464	12927	776.464	9485.3		776.464	10071	776.464	12551		776.464	14576.5		866.32	3579.02
778.094	8344.45	778.094	12910.8	778.094	9522.49		778.094	10123.2	778.094	12508.2		778.094	14579.6		868.248	3612.82
779.723	8257.52	779.723	12892.5	779.723	9544.24		779.723	10039.7	779.723	12592.8		779.723	14573.9		870.177	3649.52
781.35	8407.34	781.35	12993.6	781.35	9573.89		781.35	10187.8	781.35	12600.7		781.35	14579.4		872.105	3691.84
782.979	8332.02	782.979	13004.2	782.979	9616.53		782.979	10129.6	782.979	12562		782.979	14480.3		874.034	3741.64
784.607	8374.01	784.607	12995.8	784.607	9587.89		784.607	10158.4	784.607	12694		784.607	14626.6		875.962	3798.07
786.236	8415.92	786.236	13048.3	786.236	9584.72		786.236	10218.8	786.236	12599		786.236	14598.1		877.89	3857.38
787.863	8349.17	787.863	13050.2	787.863	9559.99		787.863	10164.4	787.863	12711.5		787.863	14577.8		879.819	3922.61
789.489	8406.02	789.489	13053.3	789.489	9695.55		789.489	10239.2	789.489	12694.7		789.489	14779.5		881.747	3986.89
791.116	8469.45	791.116	13273.5	791.116	9715.18		791.116	10259.6	791.116	12740.3		791.116	14936.3		883.676	4047.01
792.744	8524.67	792.744	13242.6	792.744	9749.8		792.744	10379.2	792.744	12848.5		792.744	15139.5		885.604	4105.14
794.37	8537.04	794.37	13438.2	794.37	9874.64		794.37	10477.9	794.37	12999.5		794.37	15463.1		887.533	4165.09
795.995	8600.43	795.995	13515.8	795.995	9968.72		795.995	10628.3	795.995	13161		795.995	15931.8		889.461	4226.32
797.621	8737.6	797.621	13751.8	797.621	10124.6		797.621	10806.6	797.621	13335.5		797.621	16465.9		891.39	4289.57
799.247	8884.01	799.247	13799.6	799.247	10219.5		799.247	10973.4	799.247	13510.3		799.247	16957.3		893.318	4357.07
800.871	8927.79	800.871	14110.6	800.871	10349.9		800.871	11153.2	800.871	13762		800.871	17748.8		895.247	4425.91
802.496	9116.76	802.496	14349.7	802.496	10605.8		802.496	11520.1	802.496	14055.7		802.496	18520.4		897.175	4490.79
804.121	9262.52	804.121	14685.2	804.121	10828.8		804.121	11840.4	804.121	14369.5		804.121	19448.8		899.104	4550.03
805.744	9426.45	805.744	14976.7	805.744	11062.4		805.744	12116.2	805.744	14641		805.744	20495.1		901.032	4607.83
807.368	9485.44	807.368	15132.3	807.368	11113.3		807.368	12198.4	807.368	14720		807.368	20902.1		902.961	4665.37
808.991	9556.56	808.991	15099.5	808.991	11286.3		808.991	12342.2	808.991	14910		808.991	21050.1		904.889	4722
810.615	9384.72	810.615	14984.2	810.615	11111.8		810.615	12205.1	810.615	14721		810.615	20705.4		906.817	4776.47
812.236	9499.51	812.236	15097.5	812.236	11160.1		812.236	12254.8	812.236	14796		812.236	21028.4		908.746	4828.81
813.86	9587.26	813.86	15193.8	813.86	11295.2		813.86	12373.2	813.86	14992.5		813.86	21457.9		910.674	4876.73
815.481	9729.66	815.481	15512.5	815.481	11514.4		815.481	12740.1	815.481	15273.3		815.481	22344.6		912.603	4919.07
817.103	9889.22	817.103	15831.3	817.103	11657.1		817.103	13037.4	817.103	15696.5		817.103	23347.7		914.531	4957.34
818.724	10064.8	818.724	16143.6	818.724	11924.4		818.724	13325.5	818.724	15868.5		818.724	24225		916.46	4991.8
820.346	10159.8	820.346	16253.3	820.346	12082.6		820.346	13479.2	820.346	16052		820.346	24806.8		918.388	5023.43
821.966	10207.9	821.966	16256.5	821.966	12159.1		821.966	13555.4	821.966	16059		821.966	24831.4		920.317	5049.3
823.588	10179.1	823.588	16281.3	823.588	12151.9		823.588	13467.3	823.588	16046		823.588	24726.2		922.245	5067.92
825.207	10109.5	825.207	16116.6	825.207	12088.6		825.207	13374.2	825.207	15943		825.207	24254.3		924.174	5080.85
826.826	10084.5	826.826	15993.4	826.826	12050.7		826.826	13209.5	826.826	15836		826.826	23842.8		926.102	5089.8
828.447	10059	828.447	15907.1	828.447	12039.2		828.447	13177	828.447	15624.5		828.447	23452.3		928.031	5095.21
830.066	10149.7	830.066	15872.4	830.066	12071.6		830.066	13172.4	830.066	15694.7		830.066	23176.4		929.959	5097.94
831.686	10144.2	831.686	15951.2	831.686	12250.4		831.686	13141.2	831.686	15768.3		831.686	23174.1		931.888	5095.25
833.304	10217.4	833.304	15985.1	833.304	12322.6		833.304	13340.4	833.304	15814		833.304	23120		933.816	5093.43
834.921	10274.9	834.921	16005.8	834.921	12453.7		834.921	13417.9	834.921	15941.3		834.921	23230.8		935.745	5096.15
836.539	10249.8	836.539	16031.3	836.539	12454.1		836.539	13523.8	836.539	15886.8		836.539	22946.8		937.673	5103.86
838.158	10274.7	838.158	15903.6	838.158	12476.9		838.158	13733.4	838.158	15967.5		838.158	22836.1		939.601	5114.09
839.775	10159.6	839.775	15796	839.775	12346.2		839.775	13732.8	839.775	15813.5		839.775	22282.8		941.53	5127.2
841.391	10052.9	841.391	15598.8	841.391	12232.5		841.391	13694.9	841.391	15667.8		841.391	21569		943.458	5142.54
843.008	9932.63	843.008	15480.9	843.008	12057.8		843.008	13505.6	843.008	15505.7		843.008	20811.9		945.387	5157.91
844.626	9753.99	844.626	15235.8	844.626	11865.7		844.626	13124.3	844.626	15163.3		844.626	20090.3		947.315	5173.48
846.241	9630.13	846.241	15083.8	846.241	11652.5		846.241	12677	846.241	14909.5		846.241	19402		949.244	5197.85
847.857	9575.38	847.857	15047.1	847.857	11471.9		847.857	12388.8	847.857	14846.5		847.857	18870.8		951.172	5232.74
849.472	9403.49	849.472	14798.9	849.472	11299.2		849.472	11984	849.472	14566.3		849.472	18391.1		953.101	5274.82
851.087	9456.74	851.087	14819.1	851.087	11112.4		851.087	11916.2	851.087	14468.8		851.087	18135.3		955.029	5325.2
852.701	9429.97	852.701	14716.4	852.701	11035.3		852.701	11700.5	852.701	14330.5		852.701	17808.5		956.958	5379.3
854.318	9353.06	854.318	14617.9	854.318	10941.4		854.318	11544.2	854.318	14202.5		854.318	17644.3		958.886	5432.42
855.932	9324.38	855.932	14633.8	855.932	11021.4		855.932	11627.1	855.932	14270.2		855.932	17613		960.815	5480.55
857.545	9308.47	857.545	14578	857.545	10897.7		857.545	11524.2	857.545	14131.2		857.545	17479.2		962.743	5536.52
859.159	9344.17	859.159	14640.1	859.159	10986.2		859.159	11511.2	859.159	14070		859.159	17351.4		964.672	5606.3
860.772	9438.38	860.772	14714.8	860.772	11018		860.772	11633.2	860.772	14262.8		860.772	17321		966.6	5683.67
862.385	9485.91	862.385	14735.9	862.385	11136.2		862.385	11647.4	862.385	14255.5		862.385	17308.4		968.528	5757
863.997	9458.68	863.997	14849.2	863.997	11160.7		863.997	11686.4	863.997	14255.5		863.997	17227		970.457	5825.24
865.61	9604.97	865.61	14861	865.61	11338.2		865.61	11813.1	865.61	14407		865.61	17334.9		972.385	5890.74
867.222	9562.52	867.222	14834.8	867.222	11430.7		867.222	11775.9	867.222	14363.7		867.222	17234		974.314	5954.58
868.833	9678.7	868.833	14920.4	868.833	11415.1		868.833	11884.3	868.833	14406.8		868.833	17181.3		976.242	6015.15
870.445	9628.47	870.445	14829.8	870.445	11465.8		870.445	11842.9	870.445	14422.3		870.445	17107.9		978.171	6072.07
872.056	9724.88	872.056	14896.4	872.056	11467.4		872.056	11935.4	872.056	14435.3		872.056	17138.5		980.099	6126.38
873.667	9638.7	873.667	14876.1	873.667	11343.3		873.667	12028.4	873.667	14396		873.667	17009.8		982.028	6168.97
875.276	9690.31	875.276	14939.9	875.276	11396.2		875.276	12222.1	875.276	14536		875.276	17034.5		983.956	6196.82
876.886	9704.16	876.886	14909.3	876.886	11360.6		876.886	12302.7	876.886	14567		876.886	17001.3		985.885	6212.56
878.496	9555.01	878.496	14874.6	878.496	11291.6		878.496	12375.2	878.496	14460.5		878.496	16860.8		987.813	6219.59
880.106	9724.38	880.106	14975.3	880.106	11343.3		880.106	12550.9	880.106	14570.8		880.106	16865		989.742	6221.16
881.715	9638.81	881.715	14914.8	881.715	11399.8		881.715	12439.7	881.715	14430.5		881.715	16793.6		991.67	6211.33
883.324	9696.95	883.324	14886	883.324	11377.5		883.324	12337.6	883.324	14374.7		883.324	16628.8		993.598	6186.89
884.931	9689.49	884.931	14862.3	884.931	11360.2		884.931	12193.7	884.931	14406.7		884.931	16441.8		995.527	6154.04
886.54	9735.92	886.54	15041.9	886.54	11382.2		886.54	12071.5	886.54	14429.5		886.54	16359.3		997.455	6117.25
888.148	9872.22	888.148	14919.4	888.148	11492.8		888.148	12078.1	888.148	14470		888.148	16309.6		999.384	6074.94
889.757	9849.34	889.757	15047	889.757	11524		889.757	11976.9	889.757	14375.7		889.757	16174.5		1001.31	6029.58
891.362	9985.85	891.362	15223.9	891.362	11740.9		891.362	11964.7	891.362	14554.8		891.362	16265.1		1003.24	5982.11
892.97	9964.52	892.97	15090.3	892.97	11828.7		892.97	11950.9	892.97	14548		892.97	16154		1005.17	5934.45
894.577	9996.97	894.577	15185.9	894.577	11952.7		894.577	11921.4	894.577	14548.5		894.577	16002		1007.1	5886.26
896.182	10131.7	896.182	15317.7	896.182	12151.5		896.182	11964.9	896.182	14685		896.182	16058.5		1009.03	5832.18
897.789	10118.5	897.789	15383.6	897.789	12248.6		897.789	11888	897.789	14779.8		897.789	16045.8		1010.96	5777.76
899.395	10208.6	899.395	15459.4	899.395	12365.9		899.395	11919.9	899.395	14841.2		899.395	16027.5		1012.88	5729.93
900.999	10263.2	900.999	15691.6	900.999	12463.7		900.999	12083.4	900.999	15015.8		900.999	16229.5		1014.81	5681.7
902.605	10286.9	902.605	15825.8	902.605	12403.6		902.605	12150	902.605	15108.3		902.605	16056.8		1016.74	5622.19
904.211	10269.9	904.211	15985.2	904.211	12390.6		904.211	12320.9	904.211	15157.3		904.211	16205.5		1018.67	5558.33
905.814	10379.1	905.814	16176.4	905.814	12505.7		905.814	12501	905.814	15381		905.814	16445		1020.6	5511.73
907.419	10453.2	907.419	16217.9	907.419	12574.7		907.419	12807.6	907.419	15402.7		907.419	16607.2		1022.53	5482.56
909.022	10557.1	909.022	16422.7	909.022	12721.3		909.022	13168.2	909.022	15694.2		909.022	16880.6		1024.45	5460.33
910.626	10732.8	910.626	16646.6	910.626	13005.1		910.626	13687.5	910.626	16012.8		910.626	17258.5		1026.38	5442.08
912.228	10882.8	912.228	16797.5	912.228	13104.6		912.228	14152.9	912.228	16189.8		912.228	17639		1028.31	5431.05
913.832	10957.4	913.832	17004.4	913.832	13339.2		913.832	14634.7	913.832	16364.5		913.832	18002.5		1030.24	5433.33
915.434	10974.4	915.434	17079.5	915.434	13540.6		915.434	14834.9	915.434	16435.2		915.434	17931.3		1032.17	5447.74
917.037	11017.1	917.037	17128.6	917.037	13432.2		917.037	14955.2	917.037	16319.5		917.037	17685.5		1034.1	5455.26
918.638	11010.7	918.638	17021.2	918.638	13445.1		918.638	14943.7	918.638	16431.3		918.638	17442.8		1036.03	5453.48
920.239	11093.9	920.239	17137.3	920.239	13725.6		920.239	15191.9	920.239	16613		920.239	17473		1037.95	5443.71
921.842	11016.8	921.842	17003.8	921.842	13586		921.842	15242.3	921.842	16412.5		921.842	17077.5		1039.88	5424.29
923.442	11049.6	923.442	17172.7	923.442	13783.3		923.442	15294.5	923.442	16640		923.442	17269.5		1041.81	5391.27
925.044	11090.2	925.044	17288.3	925.044	13892.5		925.044	15327.5	925.044	16792		925.044	17457.8		1043.74	5353
926.643	11187.9	926.643	17215.5	926.643	13973.5		926.643	15115	926.643	16899		926.643	17597.3		1045.67	5311.36
928.243	11132.1	928.243	17265.9	928.243	13993.8		928.243	14929.6	928.243	16976.5		928.243	17818		1047.6	5265.12
929.844	11234	929.844	17257.5	929.844	13856.1		929.844	14692.2	929.844	17012.8		929.844	18058.8		1049.52	5210.65
931.443	11163.5	931.443	17236.9	931.443	13817.7		931.443	14551.2	931.443	17141.2		931.443	18186		1051.45	5150.83
933.041	11172.5	933.041	17232.1	933.041	13705.1		933.041	14366.7	933.041	17172.5		933.041	18196		1053.38	5090.04
934.64	11292.7	934.64	17137.2	934.64	13593.3		934.64	14311.2	934.64	17194.5		934.64	18371.3		1055.31	5025.97
936.24	11225.7	936.24	17215.8	936.24	13555.4		936.24	14055.7	936.24	17252		936.24	18365.5		1057.24	4960.36
937.837	11333.4	937.837	17237	937.837	13479		937.837	14080.2	937.837	17310		937.837	18298.7		1059.17	4893.35
939.435	11178.7	939.435	17056.3	939.435	13250.7		939.435	13870.2	939.435	17117.2		939.435	17980.3		1061.1	4827.91
941.032	11198.8	941.032	17032.6	941.032	13105.8		941.032	13805.6	941.032	17067.3		941.032	17696.7		1063.02	4763.52
942.629	11114.8	942.629	17049.6	942.629	12945.5		942.629	13672.2	942.629	17006.2		942.629	17453.5		1064.95	4701.22
944.225	11101.1	944.225	17144.1	944.225	12923.3		944.225	13784.9	944.225	16945.5		944.225	17345.8		1066.88	4641.09
945.824	11131.8	945.824	16916.7	945.824	12720.4		945.824	13683.4	945.824	16946		945.824	17051.8		1068.81	4583.26
947.42	10930.7	947.42	16882.5	947.42	12608		947.42	13650.1	947.42	16818.5		947.42	17024.5		1070.74	4526.81
949.016	10954.3	949.016	16982.2	949.016	12596.9		949.016	13721.6	949.016	16904		949.016	17042.3		1072.67	4472.7
950.611	10823.4	950.611	16953.7	950.611	12489.2		950.611	13645.5	950.611	16938		950.611	16950.5		1074.59	4419.88
952.206	10837.8	952.206	16851.5	952.206	12482.3		952.206	13690.5	952.206	16885.8		952.206	16995		1076.52	4363.28
953.801	10694.2	953.801	16717	953.801	12396.9		953.801	13548	953.801	16845.3		953.801	16861		1078.45	4301.07
955.396	10644.6	955.396	16705.2	955.396	12267.6		955.396	13451	955.396	16814.8		955.396	16874.3		1080.38	4239.3
956.99	10556.8	956.99	16506.8	956.99	12300.4		956.99	13413.6	956.99	16728		956.99	16856.1		1082.31	4181.18
958.584	10542.9	958.584	16502.1	958.584	12172.9		958.584	13279.1	958.584	16735.5		958.584	16738.8		1084.24	4126.75
960.178	10518	960.178	16388.6	960.178	12278.2		960.178	13166.2	960.178	16705		960.178	16737.5		1086.16	4074.33
961.772	10549.5	961.772	16404.8	961.772	12349.1		961.772	13198.6	961.772	16730.2		961.772	16644.7		1088.09	4023.82
963.365	10520	963.365	16170.6	963.365	12340.8		963.365	13225.5	963.365	16698.5		963.365	16588.8		1090.02	3974.88
964.958	10428.7	964.958	16138.3	964.958	12157.2		964.958	13133.2	964.958	16665		964.958	16568.9		1091.95	3926.05
966.551	10427.8	966.551	16145.5	966.551	12327.9		966.551	13350.7	966.551	16705		966.551	16598.6		1093.88	3879.18
968.143	10403.2	968.143	16104.9	968.143	12350.6		968.143	13343.9	968.143	16625.2		968.143	16506.7		1095.81	3839.88
969.733	10489.6	969.733	16177.8	969.733	12460.8		969.733	13449.5	969.733	16839		969.733	16521.3		1097.74	3805.59
971.325	10514.2	971.325	16030.8	971.325	12447.1		971.325	13442.2	971.325	16785.5		971.325	16532.8		1099.66	3774.21
972.917	10611.2	972.917	16080.8	972.917	12473.5		972.917	13601.8	972.917	16924.2		972.917	16437.7		1101.59	3747.43
974.508	10621.1	974.508	16228.5	974.508	12721.6		974.508	13744.7	974.508	17028.7		974.508	16659		1103.52	3728.59
976.1	10689.5	976.1	16266.8	976.1	12783		976.1	13860.2	976.1	17140.7		976.1	16589.8		1105.45	3717.43
977.688	10798.8	977.688	16420.4	977.688	12913.4		977.688	14138	977.688	17353.5		977.688	16487.6		1107.38	3708.14
979.279	10859.4	979.279	16513.3	979.279	13083.4		979.279	14487.9	979.279	17731.2		979.279	16581.3		1109.31	3697.17
980.869	10931.1	980.869	16530.6	980.869	13118.7		980.869	14786.7	980.869	17919		980.869	16661.6		1111.23	3685.59
982.459	11082.1	982.459	16932.5	982.459	13339.8		982.459	15001	982.459	18282.8		982.459	16864		1113.16	3676.3
984.047	11045.2	984.047	16955.1	984.047	13363.5		984.047	14972.3	984.047	18497.2		984.047	16779.8		1115.09	3669.35
985.636	11056.8	985.636	17015.3	985.636	13368.6		985.636	14799	985.636	18827		985.636	16763		1117.02	3662.94
987.225	11037.7	987.225	17121.3	987.225	13385.8		987.225	14798.2	987.225	19125		987.225	16980.3		1118.95	3661.22
988.812	11020	988.812	17277.8	988.812	13439.9		988.812	14868.7	988.812	19339		988.812	16924.6		1120.88	3667
990.401	10997.9	990.401	17383.8	990.401	13475		990.401	14968.7	990.401	19734		990.401	17003.8		1122.81	3672.72
991.989	10924.4	991.989	17323.3	991.989	13327.8		991.989	15076.3	991.989	19876		991.989	16894.2		1124.73	3674.54
993.575	10814.9	993.575	17260.7	993.575	13218.4		993.575	15286.2	993.575	19891.5		993.575	16874.5		1126.66	3681.23
995.163	10890	995.163	17373.8	995.163	13393.1		995.163	15800.8	995.163	20102.2		995.163	17055.8		1128.59	3681.42
996.748	10758.9	996.748	17151.4	996.748	13363.5		996.748	16122.8	996.748	19732.5		996.748	16980.3		1130.52	3691.22
998.336	10718.6	998.336	17029.8	998.336	13189.4		998.336	16477.2	998.336	19301.3		998.336	16993.2		1132.45	3698.06
999.921	10747.8	999.921	17078.2	999.921	13148.1		999.921	17027.7	999.921	18948.2		999.921	17224.2		1134.38	3701.62
1001.51	10667.4	1001.51	16811	1001.51	12969.1		1001.51	17239.6	1001.51	18627.7		1001.51	17310.3		1136.31	3703.94
1003.09	10549.4	1003.09	16650.8	1003.09	12842.8		1003.09	17008.7	1003.09	18040.7		1003.09	17418.5		1138.23	3705.36
1004.68	10615.4	1004.68	16642.2	1004.68	12713		1004.68	16621.3	1004.68	17904.7		1004.68	17817.2		1140.16	3706.74
1006.26	10513.6	1006.26	16483.3	1006.26	12575.9		1006.26	15903.7	1006.26	17557.7		1006.26	17865.5		1142.09	3709.42
1007.85	10476.3	1007.85	16442.8	1007.85	12534		1007.85	15246.3	1007.85	17303.7		1007.85	18038.2		1144.02	3711.22
1009.43	10459.7	1009.43	16406	1009.43	12441.2		1009.43	14681.2	1009.43	17100.5		1009.43	18178.7		1145.95	3711.83
1011.01	10508.2	1011.01	16522	1011.01	12526.9		1011.01	14437.3	1011.01	17018.7		1011.01	18505.8		1147.88	3712.51
1012.6	10468.7	1012.6	16443	1012.6	12490.2		1012.6	14134.9	1012.6	16898.2		1012.6	18710.5		1149.8	3714.58
1014.18	10454.5	1014.18	16394.9	1014.18	12470.8		1014.18	13915.3	1014.18	16708.8		1014.18	18682.7		1151.73	3716.67
1015.76	10335.4	1015.76	16435.4	1015.76	12427.3		1015.76	13712.2	1015.76	16600		1015.76	18512.8		1153.66	3719.51
1017.35	10397	1017.35	16317.2	1017.35	12377.9		1017.35	13484.6	1017.35	16374.8		1017.35	18236.3		1155.59	3724.51
1018.93	10420.6	1018.93	16376.8	1018.93	12402.6		1018.93	13469.4	1018.93	16421.2		1018.93	18307.5		1157.52	3731.8
1020.51	10509.1	1020.51	16366.3	1020.51	12506.3		1020.51	13487.1	1020.51	16411.5		1020.51	18268.8		1159.45	3740.36
1022.09	10551.4	1022.09	16514.2	1022.09	12694.1		1022.09	13499.2	1022.09	16488.2		1022.09	18405.8		1161.38	3749.1
1023.67	10528	1023.67	16467.3	1023.67	12775.8		1023.67	13485.4	1023.67	16652		1023.67	18469.8		1163.3	3755.65
1025.25	10727.7	1025.25	16634.6	1025.25	13001.7		1025.25	13754.3	1025.25	16778.7		1025.25	18631		1165.23	3761.22
1026.84	10793.4	1026.84	16700	1026.84	13073.9		1026.84	13971.9	1026.84	17023.8		1026.84	18817		1167.16	3768.68
1028.42	10758.2	1028.42	16827.8	1028.42	13200.7		1028.42	13961.8	1028.42	17067		1028.42	18832.3		1169.09	3778.4
1030	10985.2	1030	17055.8	1030	13433		1030	14136.3	1030	17330.5		1030	19115.2		1171.02	3788.86
1031.58	10980.7	1031.58	16908.8	1031.58	13344.7		1031.58	14198.9	1031.58	17293		1031.58	19104.7		1172.95	3797.59
1033.16	10987.6	1033.16	17120.1	1033.16	13387.1		1033.16	14259.7	1033.16	17316.2		1033.16	19304.5		1174.87	3806.28
1034.73	11043	1034.73	17257.4	1034.73	13386.7		1034.73	14348.9	1034.73	17438		1034.73	19513		1176.8	3813.29
1036.31	10950.5	1036.31	17303.4	1036.31	13448.8		1036.31	14205.1	1036.31	17378.5		1036.31	19614.8		1178.73	3818.24
1037.89	11046.4	1037.89	17454.5	1037.89	13440.4		1037.89	14229.4	1037.89	17453.5		1037.89	19847		1180.66	3824.59
1039.47	11100.5	1039.47	17559.6	1039.47	13308		1039.47	14234.6	1039.47	17521.7		1039.47	20088.2		1182.59	3834.43
1041.05	11124	1041.05	17581.5	1041.05	13399.3		1041.05	14242.3	1041.05	17503		1041.05	20160.2		1184.52	3845.91
1042.63	11135.8	1042.63	17634.8	1042.63	13318.1		1042.63	14365	1042.63	17493.8		1042.63	20235.2		1186.44	3855.96
1044.2	11130.5	1044.2	17713.5	1044.2	13340.6		1044.2	14283	1044.2	17524.8		1044.2	20365		1188.37	3866.11
1045.78	11173.8	1045.78	17813.6	1045.78	13263.5		1045.78	14366.4	1045.78	17487.5		1045.78	20466.8		1190.3	3877.15
1047.36	11229.1	1047.36	17930.7	1047.36	13273.9		1047.36	14434	1047.36	17635		1047.36	20764.5		1192.23	3888.13
1048.93	11217.1	1048.93	17873.6	1048.93	13247.7		1048.93	14369.9	1048.93	17525.5		1048.93	20780.8		1194.16	3898.32
1050.51	11422.4	1050.51	18169.3	1050.51	13459.3		1050.51	14599.8	1050.51	17840.5		1050.51	21146.5		1196.09	3909.54
1052.09	11274	1052.09	18255.5	1052.09	13338.1		1052.09	14611.6	1052.09	17667		1052.09	21111		1198.02	3919.52
1053.66	11341.9	1053.66	18319	1053.66	13426.5		1053.66	14672.6	1053.66	17815		1053.66	21255.3		1199.94	3931.41
1055.24	11359.1	1055.24	18280.5	1055.24	13288.7		1055.24	14679	1055.24	17805.2		1055.24	21287.3		1201.87	3941.84
1056.81	11368	1056.81	18416.2	1056.81	13373.4		1056.81	14822.3	1056.81	17807.5		1056.81	21255.3
1058.38	11417.7	1058.38	18559.1	1058.38	13423.7		1058.38	14981.6	1058.38	17948.8		1058.38	21337.3
1059.96	11481.2	1059.96	18520	1059.96	13438.5		1059.96	14888.5	1059.96	17971		1059.96	21387.5
1061.53	11484.5	1061.53	18732.3	1061.53	13527.9		1061.53	15214.1	1061.53	18154.7		1061.53	21633
1063.11	11489.7	1063.11	18708.8	1063.11	13437.2		1063.11	15235	1063.11	18088.5		1063.11	21528.2
1064.68	11666.8	1064.68	18976	1064.68	13651.5		1064.68	15507.8	1064.68	18431		1064.68	21865.2
1066.25	11612.5	1066.25	19024.1	1066.25	13610.1		1066.25	15600.8	1066.25	18315.7		1066.25	22045.5
1067.83	11744.3	1067.83	19187.2	1067.83	13692.9		1067.83	15805.9	1067.83	18603.7		1067.83	22342.8
1069.4	11818.2	1069.4	19295.5	1069.4	13790		1069.4	15783.4	1069.4	18698.7		1069.4	22365.8
1070.97	11801.9	1070.97	19291.6	1070.97	13854.9		1070.97	15854.9	1070.97	18750.5		1070.97	22579
1072.54	11856.6	1072.54	19617.4	1072.54	13890		1072.54	15943.7	1072.54	18985.8		1072.54	22797
1074.11	11973.9	1074.11	19679.1	1074.11	13997.9		1074.11	16055.1	1074.11	19034.7		1074.11	23046.8
1075.68	11999	1075.68	19834	1075.68	14042.9		1075.68	15962.3	1075.68	19110.3		1075.68	23269.3
1077.26	12086.2	1077.26	19979.6	1077.26	14043.6		1077.26	16076.7	1077.26	19155.2		1077.26	23487.5
1078.82	12180.4	1078.82	20025.6	1078.82	14165.9		1078.82	16199.5	1078.82	19305.8		1078.82	23705.8
1080.4	12280.7	1080.4	20255.3	1080.4	14319.7		1080.4	16359	1080.4	19458.2		1080.4	24146.5
1081.97	12308.2	1081.97	20284.4	1081.97	14443.2		1081.97	16390.8	1081.97	19591.5		1081.97	24483.8
1083.54	12432.4	1083.54	20589.9	1083.54	14544.7		1083.54	16519.2	1083.54	19669.5		1083.54	24672
1085.11	12479.3	1085.11	20545.3	1085.11	14571		1085.11	16609.9	1085.11	19745.2		1085.11	24875.5
1086.67	12460.7	1086.67	20709.9	1086.67	14697.4		1086.67	16660.7	1086.67	19864.5		1086.67	25155.5
1088.24	12506.9	1088.24	20689.8	1088.24	14599.4		1088.24	16586.3	1088.24	19720.2		1088.24	25114.8
1089.81	12443.5	1089.81	20691.2	1089.81	14536.5		1089.81	16626.3	1089.81	19732.2		1089.81	25074.5
1091.38	12427.6	1091.38	20691.3	1091.38	14590.9		1091.38	16613.3	1091.38	19802.7		1091.38	25128.8
1092.95	12464.9	1092.95	20779.5	1092.95	14479.5		1092.95	16563.7	1092.95	19804.2		1092.95	25088.8
1094.51	12317	1094.51	20712.2	1094.51	14377.4		1094.51	16410.7	1094.51	19576.7		1094.51	25028.5
1096.08	12422.6	1096.08	20811.4	1096.08	14500.4		1096.08	16630.6	1096.08	19753.5		1096.08	25408.3
1097.65	12454	1097.65	20794.8	1097.65	14567.1		1097.65	16687.5	1097.65	19840.8		1097.65	25396
1099.21	12428.8	1099.21	20751.8	1099.21	14561.7		1099.21	16592.9	1099.21	19805.7		1099.21	25792.3
1100.78	12522.9	1100.78	21051	1100.78	14615.9		1100.78	16823.9	1100.78	19996		1100.78	26184.3
1102.35	12575.7	1102.35	21021.1	1102.35	14757.4		1102.35	16919.4	1102.35	20080.2		1102.35	26734.7
1103.91	12672	1103.91	21396.4	1103.91	15009.8		1103.91	17333.7	1103.91	20444.7		1103.91	27782.1
1105.48	12901.8	1105.48	21709	1105.48	15229		1105.48	17622.7	1105.48	20764.5		1105.48	29002.3
1107.04	13123.2	1107.04	21922.4	1107.04	15433.2		1107.04	18023.6	1107.04	21060.5		1107.04	30362.2
1108.61	13436.1	1108.61	22655.1	1108.61	15906.6		1108.61	18702.6	1108.61	21740.5		1108.61	32462
1110.17	13494.3	1110.17	22936.3	1110.17	16140.5		1110.17	18995.2	1110.17	22105.7		1110.17	33924.5
1111.74	13616.5	1111.74	23157.8	1111.74	16395		1111.74	19354.2	1111.74	22433.5		1111.74	34866
1113.3	13597.4	1113.3	23057.5	1113.3	16165.1		1113.3	19251.9	1113.3	22443.5		1113.3	34457.1
1114.86	13196.3	1114.86	22307.9	1114.86	15668.1		1114.86	18480.1	1114.86	21554.7		1114.86	32761.3
1116.43	12882.9	1116.43	21450.9	1116.43	15191.7		1116.43	17793.4	1116.43	20768.5		1116.43	30706.8
1117.99	12491.7	1117.99	20853.8	1117.99	14738.8		1117.99	17110.7	1117.99	20250.5		1117.99	28789.7
1119.55	12234.4	1119.55	20335.9	1119.55	14366.9		1119.55	16505.1	1119.55	19498.5		1119.55	27273.8
1121.11	12009.5	1121.11	19916.5	1121.11	14027.3		1121.11	16081.6	1121.11	19124.3		1121.11	26006.5
1122.68	11748.2	1122.68	19499	1122.68	13751.9		1122.68	15577.1	1122.68	18665.3		1122.68	24886.8
1124.24	11625.2	1124.24	19080.8	1124.24	13492.6		1124.24	15229	1124.24	18297		1124.24	24040.2
1125.8	11441	1125.8	18705.4	1125.8	13244.7		1125.8	14958.6	1125.8	18028		1125.8	23269.5
1127.36	11272.8	1127.36	18524.5	1127.36	13041.1		1127.36	14679.9	1127.36	17612.2		1127.36	22731.5
1128.92	11151.9	1128.92	18286.3	1128.92	12973.2		1128.92	14487.3	1128.92	17529.2		1128.92	22175.5
1130.48	11088.8	1130.48	18094.9	1130.48	12773.5		1130.48	14273.6	1130.48	17294.8		1130.48	21806.2
1132.04	10999.4	1132.04	17893.6	1132.04	12676.5		1132.04	14234.5	1132.04	17170.2		1132.04	21503
1133.6	10929.2	1133.6	17722	1133.6	12588.8		1133.6	13981.2	1133.6	16896.5		1133.6	21212.2
1135.16	10790	1135.16	17621.6	1135.16	12463.9		1135.16	13857.7	1135.16	16737		1135.16	20813.1
1136.72	10769.7	1136.72	17475.6	1136.72	12445.6		1136.72	13811.2	1136.72	16747.5		1136.72	20815.8
1138.28	10646.4	1138.28	17291.1	1138.28	12326.7		1138.28	13592.1	1138.28	16627		1138.28	20461.3
1139.84	10683.8	1139.84	17251.2	1139.84	12317.7		1139.84	13540.8	1139.84	16537.7		1139.84	20301.3
1141.39	10595.2	1141.39	17198	1141.39	12252.7		1141.39	13528	1141.39	16454.7		1141.39	20371.5
1142.95	10549	1142.95	17131.2	1142.95	12252.5		1142.95	13448.9	1142.95	16396.5		1142.95	20328.2
1144.51	10613	1144.51	17041	1144.51	12300.5		1144.51	13472.3	1144.51	16417.5		1144.51	20313.2
1146.07	10527.7	1146.07	16901.6	1146.07	12226.6		1146.07	13451.3	1146.07	16286.7		1146.07	20313.3
1147.62	10518.9	1147.62	16850.6	1147.62	12212.2		1147.62	13361	1147.62	16223.5		1147.62	20155.3
1149.18	10443.7	1149.18	16752.6	1149.18	12088		1149.18	13227.6	1149.18	16124.5		1149.18	20022.3
1150.74	10400.7	1150.74	16747.1	1150.74	12012.7		1150.74	13167	1150.74	16041		1150.74	19860.8
1152.29	10260.5	1152.29	16562	1152.29	11872.1		1152.29	12989.5	1152.29	15911.2		1152.29	19497.2
1153.85	10259.9	1153.85	16439.8	1153.85	11837.9		1153.85	12876.6	1153.85	15873.2		1153.85	19432.8
1155.4	10156.6	1155.4	16285.8	1155.4	11851.7		1155.4	12795.1	1155.4	15698.8		1155.4	19129
1156.96	10103.8	1156.96	16232.3	1156.96	11664.4		1156.96	12709.7	1156.96	15588.2		1156.96	18881.5
1158.51	10026.1	1158.51	16026.8	1158.51	11597.3		1158.51	12609.4	1158.51	15404.8		1158.51	18685.8
1160.07	9999.09	1160.07	16155.8	1160.07	11548.9		1160.07	12610.6	1160.07	15453		1160.07	18596
1161.62	9978.91	1161.62	15917.5	1161.62	11484		1161.62	12455.8	1161.62	15313.2		1161.62	18434
1163.18	9929.52	1163.18	15957	1163.18	11434.9		1163.18	12367.4	1163.18	15268.7		1163.18	18352.3
1164.73	9893.92	1164.73	15859	1164.73	11457.9		1164.73	12489.4	1164.73	15338.5		1164.73	18317
1166.28	9830.31	1166.28	15696.8	1166.28	11324.9		1166.28	12172	1166.28	15123.8		1166.28	18157
1167.84	9872.68	1167.84	15802.8	1167.84	11403.8		1167.84	12344.9	1167.84	15260		1167.84	18238.3
1169.39	9848	1169.39	15727.5	1169.39	11459		1169.39	12316.6	1169.39	15172		1169.39	18153.5
1170.94	9889.59	1170.94	15725.5	1170.94	11474.8		1170.94	12362.8	1170.94	15219.8		1170.94	18335.8
1172.5	9918.84	1172.5	15752.3	1172.5	11471.7		1172.5	12409.8	1172.5	15209.2		1172.5	18586.8
1174.05	10007.5	1174.05	15851	1174.05	11644.1		1174.05	12510.1	1174.05	15362.5		1174.05	18844
1175.6	10039.2	1175.6	16087	1175.6	11729.1		1175.6	12677.2	1175.6	15573.2		1175.6	19529.2
1177.15	10251.5	1177.15	16329.4	1177.15	12047.7		1177.15	12968.9	1177.15	15766.5		1177.15	20449.5
1178.7	10423.7	1178.7	16520.8	1178.7	12230.1		1178.7	13331.3	1178.7	16066		1178.7	21394.7
1180.25	10598.2	1180.25	17008.3	1180.25	12603.6		1180.25	13794.8	1180.25	16565.2		1180.25	22695.3
1181.8	10707.1	1181.8	17284.8	1181.8	12853.3		1181.8	14068.9	1181.8	16880.5		1181.8	23796.2
1183.35	10904.9	1183.35	17600.3	1183.35	13071.1		1183.35	14418.7	1183.35	17194.7		1183.35	24771.2
1184.9	10800.6	1184.9	17532	1184.9	12972.9		1184.9	14429.8	1184.9	17219.8		1184.9	24741
1186.45	10755.4	1186.45	17443	1186.45	12915.1		1186.45	14315.6	1186.45	17133.5		1186.45	24426.7
1188	10635.8	1188	17091.6	1188	12673.9		1188	14063	1188	16724.5		1188	23502
1189.55	10309	1189.55	16510.1	1189.55	12320.9		1189.55	13656.2	1189.55	16225.8		1189.55	22048.7
1191.1	10167.7	1191.1	16279.5	1191.1	12007.4		1191.1	13302.4	1191.1	15835.5		1191.1	20797
1192.64	9905.13	1192.64	15821	1192.64	11710.9		1192.64	12968.1	1192.64	15460.2		1192.64	19681.5
1194.19	9702.18	1194.19	15446.2	1194.19	11454.2		1194.19	12622.2	1194.19	15065.7		1194.19	18715
1195.74	9671.63	1195.74	15255.3	1195.74	11205.4		1195.74	12510.5	1195.74	14850		1195.74	18275.5
1197.29	9567.52	1197.29	15045.8	1197.29	11160.5		1197.29	12422.2	1197.29	14687.5		1197.29	17819
1198.83	9516.52	1198.83	15011.1	1198.83	10987.2		1198.83	12414.6	1198.83	14581.5		1198.83	17558
1200.38	9514.16	1200.38	15023.2	1200.38	11069		1200.38	12462.1	1200.38	14545.7		1200.38	17512
1201.93	9558.38	1201.93	14968.1	1201.93	11016.8		1201.93	12504	1201.93	14558		1201.93	17603.8
1203.47	9417.88	1203.47	14851.9	1203.47	10973		1203.47	12386.2	1203.47	14503.8		1203.47	17519.5
1205.02	9521.92	1205.02	14964.8	1205.02	11054.1		1205.02	12505.3	1205.02	14580		1205.02	17781.5
1206.56	9528.02	1206.56	15015.5	1206.56	11035.4		1206.56	12526.9	1206.56	14697.7		1206.56	17926
1208.11	9511.7	1208.11	15064.8	1208.11	10976.2		1208.11	12565.7	1208.11	14602		1208.11	18172
1209.65	9514.43	1209.65	15032.5	1209.65	10955.4		1209.65	12517.5	1209.65	14630.8		1209.65	18462.5
1211.2	9588.59	1211.2	15279.1	1211.2	11118.2		1211.2	12592.7	1211.2	14810.5		1211.2	19022.8
1212.74	9643.41	1212.74	15279.9	1212.74	11185.4		1212.74	12619.6	1212.74	14937.2		1212.74	19281.5
1214.29	9713.41	1214.29	15410.8	1214.29	11250		1214.29	12720.7	1214.29	15065.7		1214.29	19812.3
1215.83	9808.41	1215.83	15553.8	1215.83	11390.5		1215.83	12774.4	1215.83	15209.8		1215.83	20158.8
1217.37	9646.59	1217.37	15482.5	1217.37	11266.2		1217.37	12644.8	1217.37	15083.2		1217.37	20284.8
1218.92	9913.72	1218.92	15838.2	1218.92	11486.1		1218.92	12939.5	1218.92	15447.8		1218.92	21036.5
1220.46	9816.56	1220.46	15719.2	1220.46	11445.4		1220.46	12782.6	1220.46	15365.7		1220.46	21205.2
1222	9952.45	1222	15910.5	1222	11594.8		1222	12918.5	1222	15564.2		1222	21698.5
1223.54	10038.4	1223.54	15984	1223.54	11605.2		1223.54	12984.6	1223.54	15674.8		1223.54	22083.3
1225.09	9960.52	1225.09	16059.5	1225.09	11722.4		1225.09	13094.9	1225.09	15757.5		1225.09	22317.1
1226.63	10069.2	1226.63	16090.4	1226.63	11715.9		1226.63	13108.3	1226.63	15743		1226.63	22453.8
1228.17	10054.6	1228.17	16157.5	1228.17	11676.4		1228.17	13006.9	1228.17	15810		1228.17	22528.3
1229.71	9992.18	1229.71	16051	1229.71	11724.6		1229.71	13036.1	1229.71	15803.5		1229.71	22482
1231.25	9981.06	1231.25	15941.5	1231.25	11660.9		1231.25	12921.9	1231.25	15702.5		1231.25	22121.8
1232.79	9959.52	1232.79	15941.8	1232.79	11640.2		1232.79	12774.5	1232.79	15575		1232.79	21964.3
1234.33	9991.45	1234.33	15786	1234.33	11622.7		1234.33	12594.7	1234.33	15440.2		1234.33	21554
1235.87	9819.92	1235.87	15622.8	1235.87	11478.9		1235.87	12435.4	1235.87	15261.5		1235.87	21038.8
1237.41	9795.02	1237.41	15634.5	1237.41	11423.6		1237.41	12380	1237.41	15226.2		1237.41	20991.5
1238.95	9809.74	1238.95	15499.3	1238.95	11406		1238.95	12404.1	1238.95	15112		1238.95	20556.3
1240.49	9789.43	1240.49	15514.8	1240.49	11383.6		1240.49	12313.1	1240.49	15082.5		1240.49	20460.2
1242.03	9721.79	1242.03	15368.3	1242.03	11428.2		1242.03	12198.2	1242.03	15009.7		1242.03	20316.3
1243.56	9752.16	1243.56	15323.6	1243.56	11318.4		1243.56	12120.1	1243.56	14950.2		1243.56	20235.7
1245.1	9752.47	1245.1	15402.2	1245.1	11352.1		1245.1	12107.1	1245.1	14968.5		1245.1	20225.8
1246.64	9768.92	1246.64	15351.6	1246.64	11340.8		1246.64	12181.5	1246.64	14946.7		1246.64	20261.2
1248.18	9766.99	1248.18	15460.2	1248.18	11404.6		1248.18	12190.8	1248.18	15021.2		1248.18	20386.2
1249.71	9778.88	1249.71	15333.3	1249.71	11455.3		1249.71	12243.1	1249.71	15037.7		1249.71	20350.3
1251.25	9730.93	1251.25	15380.2	1251.25	11345		1251.25	12227.2	1251.25	15023.8		1251.25	20291.5
1252.79	9682.74	1252.79	15277.8	1252.79	11311.7		1252.79	12118.4	1252.79	14985		1252.79	20231.3
1254.32	9754.42	1254.32	15342.4	1254.32	11305.7		1254.32	12066.2	1254.32	14970.5		1254.32	20095.6
1255.86	9665.52	1255.86	15192.8	1255.86	11275.9		1255.86	12026.2	1255.86	14879.5		1255.86	19864.5
1257.39	9667.52	1257.39	15176.8	1257.39	11239.3		1257.39	11935.1	1257.39	14800.5		1257.39	19586
1258.93	9585.47	1258.93	15017	1258.93	11135.3		1258.93	11731.8	1258.93	14625.2		1258.93	19177.8
1260.46	9577.02	1260.46	14946.9	1260.46	11085.2		1260.46	11704.8	1260.46	14551		1260.46	18944.3
1262	9632.16	1262	14905.5	1262	11097.7		1262	11691.8	1262	14519.7		1262	18693.2
1263.53	9485.45	1263.53	14789.3	1263.53	11021.4		1263.53	11540.8	1263.53	14384.2		1263.53	18450.5
1265.07	9462.22	1265.07	14727.5	1265.07	11017.8		1265.07	11471.2	1265.07	14338.2		1265.07	18310.8
1266.6	9526.74	1266.6	14795.8	1266.6	11015.6		1266.6	11457.2	1266.6	14418.8		1266.6	18237.3
1268.13	9480.41	1268.13	14752.5	1268.13	11034.4		1268.13	11402.1	1268.13	14293.8		1268.13	18228
1269.67	9569.38	1269.67	14820.8	1269.67	11071		1269.67	11495.1	1269.67	14460.8		1269.67	18278.2
1271.2	9552.02	1271.2	14762.8	1271.2	11031.9		1271.2	11548.5	1271.2	14387.7		1271.2	18336.3
1272.73	9569.45	1272.73	14832.5	1272.73	11051.4		1272.73	11478.8	1272.73	14317		1272.73	18358.3
1274.26	9536.59	1274.26	14872.3	1274.26	11041.9		1274.26	11552	1274.26	14461.5		1274.26	18432.8
1275.8	9585.06	1275.8	14740.3	1275.8	11032.7		1275.8	11483.6	1275.8	14397		1275.8	18427.8
1277.33	9510.59	1277.33	14866.2	1277.33	11177.7		1277.33	11593.9	1277.33	14507.7		1277.33	18681
1278.86	9619.54	1278.86	14900.5	1278.86	11097.9		1278.86	11593.7	1278.86	14573		1278.86	18702.6
1280.39	9619.42	1280.39	14973.2	1280.39	11186.3		1280.39	11715.2	1280.39	14514.2		1280.39	18826.8
1281.92	9698.35	1281.92	15012.6	1281.92	11230.8		1281.92	11720.5	1281.92	14649		1281.92	19128.8
1283.45	9699.81	1283.45	15086.5	1283.45	11191.2		1283.45	11838.6	1283.45	14671.8		1283.45	19381.3
1284.98	9876.91	1284.98	15265.5	1284.98	11379		1284.98	11956.3	1284.98	14825.5		1284.98	19736.2
1286.51	9810.74	1286.51	15283	1286.51	11432.1		1286.51	12018.1	1286.51	14959.5		1286.51	19941
1288.04	9828.52	1288.04	15358	1288.04	11501.2		1288.04	12107.9	1288.04	14941		1288.04	20305.5
1289.57	9971.16	1289.57	15604.2	1289.57	11610.9		1289.57	12234.4	1289.57	15168		1289.57	20692.5
1291.1	10001.2	1291.1	15627	1291.1	11685.5		1291.1	12351	1291.1	15246.7		1291.1	21063.5
1292.63	10075.6	1292.63	15782.5	1292.63	11778.2		1292.63	12487.1	1292.63	15416		1292.63	21430.7
1294.15	10082.6	1294.15	15686.1	1294.15	11780.6		1294.15	12576.6	1294.15	15416		1294.15	21560.2
1295.68	10026.5	1295.68	15825	1295.68	11838.2		1295.68	12611.5	1295.68	15484		1295.68	21790.2
1297.21	10202.9	1297.21	15958.5	1297.21	11900.4		1297.21	12651.8	1297.21	15579		1297.21	21867.2
1298.74	10075.1	1298.74	15858.8	1298.74	11788.6		1298.74	12526.5	1298.74	15409		1298.74	21775.8
1300.26	10044.8	1300.26	15799	1300.26	11882.6		1300.26	12517	1300.26	15503.5		1300.26	21511.3
1301.79	9946.95	1301.79	15637.1	1301.79	11693		1301.79	12406.6	1301.79	15221.5		1301.79	21117.8
1303.32	9901.81	1303.32	15500.2	1303.32	11503.9		1303.32	12283.1	1303.32	15215.2		1303.32	20724.5
1304.84	9936.34	1304.84	15427.6	1304.84	11502.4		1304.84	12232.2	1304.84	15060.2		1304.84	20356.5
1306.37	9843.93	1306.37	15263.5	1306.37	11450.1		1306.37	12027.2	1306.37	14845.8		1306.37	19882.5
1307.89	9772.38	1307.89	15217.8	1307.89	11432.6		1307.89	11983	1307.89	14874.8		1307.89	19658.2
1309.42	9840.25	1309.42	15174	1309.42	11425.1		1309.42	11952.8	1309.42	14834.2		1309.42	19655
1310.94	9717.02	1310.94	15057.2	1310.94	11330.6		1310.94	11836.7	1310.94	14715.2		1310.94	19262
1312.47	9722.22	1312.47	15015	1312.47	11280.9		1312.47	11702.2	1312.47	14634.2		1312.47	19000.1
1313.99	9541.52	1313.99	14763.3	1313.99	11116.5		1313.99	11543.3	1313.99	14309.7		1313.99	18536.5
1315.52	9503.88	1315.52	14771.6	1315.52	11034.7		1315.52	11450.5	1315.52	14346.7		1315.52	18119
1317.04	9444.04	1317.04	14555.3	1317.04	10882.9		1317.04	11306.6	1317.04	14148.7		1317.04	17721
1318.56	9344.2	1318.56	14527	1318.56	10786.1		1318.56	11184.8	1318.56	14062.7		1318.56	17437
1320.09	9308.93	1320.09	14439	1320.09	10657.9		1320.09	11090.6	1320.09	14026.2		1320.09	17217.8
1321.61	9281.93	1321.61	14356	1321.61	10565.5		1321.61	11002.1	1321.61	13924		1321.61	17005
1323.13	9291.2	1323.13	14284.2	1323.13	10559.3		1323.13	11021.6	1323.13	13986.5		1323.13	16983
1324.66	9192.59	1324.66	14239.2	1324.66	10527.2		1324.66	10902.9	1324.66	13790.5		1324.66	16868
1326.18	9170.31	1326.18	14206.2	1326.18	10459.2		1326.18	10920.1	1326.18	13787		1326.18	16649.5
1327.7	9185.84	1327.7	14268	1327.7	10504.9		1327.7	10920.8	1327.7	13834.8		1327.7	16727.2
1329.22	9107.04	1329.22	14149.5	1329.22	10375.1		1329.22	10799.7	1329.22	13666.8		1329.22	16467.8
1330.74	9169.7	1330.74	14257.2	1330.74	10458.3		1330.74	10867	1330.74	13701.8		1330.74	16549.2
1332.26	9164.41	1332.26	14076.3	1332.26	10409.4		1332.26	10862.8	1332.26	13678		1332.26	16458.8
1333.78	9123.56	1333.78	14223.8	1333.78	10446.6		1333.78	10865.2	1333.78	13788.5		1333.78	16458.8
1335.3	9076.52	1335.3	14171	1335.3	10395.1		1335.3	10811.5	1335.3	13644		1335.3	16449.3
1336.82	9118.54	1336.82	14159	1336.82	10411.7		1336.82	10801	1336.82	13667		1336.82	16334.3
1338.34	9098.02	1338.34	14131.6	1338.34	10361.4		1338.34	10827.5	1338.34	13656.8		1338.34	16350
1339.86	9158.68	1339.86	14179.8	1339.86	10432.7		1339.86	10839.5	1339.86	13688.5		1339.86	16400.5
1341.38	9128.88	1341.38	14094.8	1341.38	10371		1341.38	10834.9	1341.38	13595.5		1341.38	16334.8
1342.9	9167.47	1342.9	14241	1342.9	10397.4		1342.9	10796	1342.9	13685.8		1342.9	16355.8
1344.42	9049.17	1344.42	14105.8	1344.42	10362.1		1344.42	10758.6	1344.42	13623.2		1344.42	16329.8
1345.94	9146.84	1345.94	14160	1345.94	10381.1		1345.94	10845.2	1345.94	13615.7		1345.94	16367
1347.45	9099.01	1347.45	14174.6	1347.45	10436.6		1347.45	10786.4	1347.45	13674		1347.45	16416.8
1348.97	9192.18	1348.97	14159	1348.97	10361.7		1348.97	10767.7	1348.97	13641.5		1348.97	16403
1350.49	9164.88	1350.49	14172.5	1350.49	10420.8		1350.49	10846.8	1350.49	13681.8		1350.49	16413
1352	9107.02	1352	14242.6	1352	10413.9		1352	10883.1	1352	13737.5		1352	16479.3
1353.52	9197.52	1353.52	14247.6	1353.52	10580.4		1353.52	10943.2	1353.52	13800.5		1353.52	16526
1355.04	9138.79	1355.04	14150.9	1355.04	10428.2		1355.04	10845.8	1355.04	13645.8		1355.04	16444.5
1356.55	9173.43	1356.55	14348.2	1356.55	10520.4		1356.55	10940	1356.55	13832.3		1356.55	16606.5
1358.07	9152.84	1358.07	14166	1358.07	10421.9		1358.07	10860.3	1358.07	13655.2		1358.07	16483
1359.58	9162.59	1359.58	14240.3	1359.58	10486.9		1359.58	10944.6	1359.58	13774.5		1359.58	16599.8
1361.1	9196.02	1361.1	14197.8	1361.1	10496		1361.1	10893.8	1361.1	13726.8		1361.1	16387.8
1362.61	9225.67	1362.61	14261.6	1362.61	10511		1362.61	10904.2	1362.61	13801.5		1362.61	16433.8
1364.13	9154.95	1364.13	14211.1	1364.13	10432.8		1364.13	10892	1364.13	13762.5		1364.13	16500
1365.64	9194.97	1365.64	14273.8	1365.64	10520.5		1365.64	10939.4	1365.64	13800.5		1365.64	16575
1367.15	9151.95	1367.15	14218	1367.15	10523.2		1367.15	10913.1	1367.15	13801.5		1367.15	16468.3
1368.67	9099.43	1368.67	14113.8	1368.67	10354.8		1368.67	10805.6	1368.67	13580.7		1368.67	16330.5
1370.18	9180.72	1370.18	14289.5	1370.18	10475.6		1370.18	10882.1	1370.18	13737.5		1370.18	16405.2
1371.69	9176.99	1371.69	14180.2	1371.69	10397.6		1371.69	10812	1371.69	13752.8		1371.69	16387
1373.21	9120.43	1373.21	14193.6	1373.21	10459.7		1373.21	10875.9	1373.21	13657.8		1373.21	16363.5
1374.72	9224.47	1374.72	14229	1374.72	10504.7		1374.72	10932.4	1374.72	13787.7		1374.72	16510.8
1376.23	9186.22	1376.23	14209.5	1376.23	10517.9		1376.23	10939.4	1376.23	13744.8		1376.23	16555.2
1377.74	9194.42	1377.74	14229.8	1377.74	10422.1		1377.74	10861.6	1377.74	13735.7		1377.74	16605
1379.25	9204.02	1379.25	14368.8	1379.25	10496.9		1379.25	10958.8	1379.25	13870.2		1379.25	16749.8
1380.77	9187.2	1380.77	14248.5	1380.77	10523.5		1380.77	10971.9	1380.77	13801		1380.77	16627.8
1382.28	9271.18	1382.28	14387.5	1382.28	10589.5		1382.28	11061.5	1382.28	13818		1382.28	16807
1383.79	9200.2	1383.79	14302.5	1383.79	10512.6		1383.79	10933.8	1383.79	13809.2		1383.79	16659.3
1385.3	9276.5	1385.3	14392.2	1385.3	10575.7		1385.3	10996	1385.3	13846.8		1385.3	16806.8
1386.81	9193.81	1386.81	14231.6	1386.81	10504.8		1386.81	10939.3	1386.81	13682		1386.81	16457.7
1388.32	9120.02	1388.32	14278.6	1388.32	10475.4		1388.32	10868.7	1388.32	13761.5		1388.32	16563.2
1389.83	9214.88	1389.83	14259	1389.83	10531		1389.83	10882.8	1389.83	13767.5		1389.83	16440.8
1391.34	9079.26	1391.34	14159.2	1391.34	10395		1391.34	10837.5	1391.34	13631		1391.34	16290
1392.84	9086.81	1392.84	14197.8	1392.84	10447.4		1392.84	10870	1392.84	13686.5		1392.84	16263.5
1394.35	9143.91	1394.35	14180.8	1394.35	10408.2		1394.35	10774	1394.35	13655.2		1394.35	16207.8
1395.86	9171.81	1395.86	14162.8	1395.86	10416.5		1395.86	10839.4	1395.86	13724		1395.86	16128.2
1397.37	9095.18	1397.37	14211.2	1397.37	10367.4		1397.37	10816.3	1397.37	13624.7		1397.37	16112
1398.88	9147.18	1398.88	14163.2	1398.88	10303		1398.88	10799.8	1398.88	13657		1398.88	16108.5
1400.38	9081.63	1400.38	14075.8	1400.38	10355		1400.38	10811.9	1400.38	13556.5		1400.38	16013.2
1401.89	9084.2	1401.89	14110.8	1401.89	10406		1401.89	10810.8	1401.89	13600.5		1401.89	16046.5
1403.4	9023.52	1403.4	14123	1403.4	10262.9		1403.4	10663.2	1403.4	13573.8		1403.4	16015
1404.9	9146.41	1404.9	14132.2	1404.9	10373.9		1404.9	10755.5	1404.9	13598.2		1404.9	16053.5
1406.41	9104.49	1406.41	14191.8	1406.41	10313		1406.41	10831.9	1406.41	13622.2		1406.41	16089
1407.92	9124.52	1407.92	14130.8	1407.92	10400.4		1407.92	10770.5	1407.92	13662.5		1407.92	16141.5
1409.42	9101.2	1409.42	14229	1409.42	10427.4		1409.42	10809.8	1409.42	13701.5		1409.42	16293.2
1410.93	9159.59	1410.93	14235	1410.93	10403.9		1410.93	10824.2	1410.93	13698.5		1410.93	16324.5
1412.43	9126.02	1412.43	14266	1412.43	10455.4		1412.43	10908.1	1412.43	13733.2		1412.43	16393.2
1413.94	9195.02	1413.94	14298	1413.94	10462.2		1413.94	10949.6	1413.94	13778.5		1413.94	16353.5
1415.44	9153.2	1415.44	14190.5	1415.44	10404.4		1415.44	10865.2	1415.44	13714		1415.44	16205
1416.94	9185.42	1416.94	14319.3	1416.94	10444.1		1416.94	10912.6	1416.94	13731		1416.94	16345.2
1418.45	9171.43	1418.45	14199.8	1418.45	10384.4		1418.45	10788.9	1418.45	13613.2		1418.45	16100
1419.95	9123.2	1419.95	14152	1419.95	10393.2		1419.95	10766.8	1419.95	13632		1419.95	16159.2
1421.46	9175.79	1421.46	14279.5	1421.46	10419.8		1421.46	10832.4	1421.46	13695.2		1421.46	16154.3
1422.96	9145.24	1422.96	14300	1422.96	10437.4		1422.96	10813.9	1422.96	13724		1422.96	16274
1424.46	9206.51	1424.46	14260.5	1424.46	10493.2		1424.46	10867.1	1424.46	13710.5		1424.46	16390.2
1425.96	9150.02	1425.96	14316.5	1425.96	10508.7		1425.96	10951.6	1425.96	13810.8		1425.96	16464
1427.46	9335.67	1427.46	14409.1	1427.46	10727.2		1427.46	11048	1427.46	13943.2		1427.46	16799.8
1428.97	9339.68	1428.97	14412.8	1428.97	10758.7		1428.97	11012.4	1428.97	14019		1428.97	16942
1430.47	9508.09	1430.47	14562	1430.47	10966.9		1430.47	11283.5	1430.47	14126.8		1430.47	17441
1431.97	9651.17	1431.97	14779.2	1431.97	11124		1431.97	11499.2	1431.97	14342.5		1431.97	17820.5
1433.47	9690.56	1433.47	14851.2	1433.47	11295.3		1433.47	11553.7	1433.47	14412.2		1433.47	18190.8
1434.97	9806.68	1434.97	15050.1	1434.97	11530.8		1434.97	11810.5	1434.97	14657.5		1434.97	18613.8
1436.47	9896.52	1436.47	15114	1436.47	11623.8		1436.47	11860	1436.47	14673.2		1436.47	19003
1437.97	10056	1437.97	15292.2	1437.97	11906		1437.97	12041.5	1437.97	14882		1437.97	19635.2
1439.47	10131.7	1439.47	15461.5	1439.47	12007.1		1439.47	12191.5	1439.47	15029		1439.47	19985.5
1440.97	10327.4	1440.97	15706.5	1440.97	12356.4		1440.97	12437.3	1440.97	15319.5		1440.97	20676.8
1442.47	10440.2	1442.47	15762	1442.47	12430.5		1442.47	12593.2	1442.47	15482.5		1442.47	21087.5
1443.97	10512.9	1443.97	16021	1443.97	12648.1		1443.97	12774.8	1443.97	15658.8		1443.97	21454.8
1445.47	10491.5	1445.47	15894.5	1445.47	12638.6		1445.47	12708	1445.47	15563.8		1445.47	21551
1446.96	10651.3	1446.96	16064.5	1446.96	12714.7		1446.96	12825.5	1446.96	15756.2		1446.96	21822.8
1448.46	10617.2	1448.46	15967.6	1448.46	12746.7		1448.46	12805.8	1448.46	15648.5		1448.46	21795.8
1449.96	10590.4	1449.96	15975.2	1449.96	12731.8		1449.96	12859.1	1449.96	15673.2		1449.96	21881.5
1451.45	10581.4	1451.45	16094.5	1451.45	12786.5		1451.45	12911.5	1451.45	15755.5		1451.45	22006.8
1452.95	10709.2	1452.95	16073.5	1452.95	12814.1		1452.95	12873.3	1452.95	15732.5		1452.95	22009.2
1454.45	10677.2	1454.45	16179.2	1454.45	12783.9		1454.45	13021.4	1454.45	15687.5		1454.45	22189.2
1455.94	10635.4	1455.94	16065.1	1455.94	12958.7		1455.94	13025.7	1455.94	15835.2		1455.94	22385.3
1457.44	10736.4	1457.44	16179.8	1457.44	12839.7		1457.44	12980.8	1457.44	15913.5		1457.44	22350.2
1458.94	10734.6	1458.94	16275	1458.94	12991.2		1458.94	12958.8	1458.94	15997.5		1458.94	22455.3
1460.43	10676.8	1460.43	16050.1	1460.43	12937.2		1460.43	12968.8	1460.43	15829.5		1460.43	22265.5
1461.93	10575	1461.93	16120.6	1461.93	12883.6		1461.93	12947.7	1461.93	15742.5		1461.93	22213.5
1463.42	10592.9	1463.42	16071	1463.42	12826.3		1463.42	12893.6	1463.42	15783		1463.42	22028.5
1464.92	10531.3	1464.92	15896.8	1464.92	12608		1464.92	12641.1	1464.92	15559.7		1464.92	21673.2
1466.41	10514.4	1466.41	15969.5	1466.41	12581.4		1466.41	12668.2	1466.41	15631.5		1466.41	21471.6
1467.9	10348.3	1467.9	15674.8	1467.9	12277.1		1467.9	12447	1467.9	15353		1467.9	20940.2
1469.4	10203.7	1469.4	15615.2	1469.4	12138.4		1469.4	12321.7	1469.4	15202		1469.4	20505.2
1470.89	10072.6	1470.89	15328.5	1470.89	11912		1470.89	12138	1470.89	14987		1470.89	19993.8
1472.39	10055.8	1472.39	15270.5	1472.39	11760.6		1472.39	12013.6	1472.39	14769.7		1472.39	19578.8
1473.88	9847.63	1473.88	15152.5	1473.88	11569.1		1473.88	11829.5	1473.88	14667.5		1473.88	19160.8
1475.37	9854.02	1475.37	15011.5	1475.37	11510.3		1475.37	11776.4	1475.37	14602.5		1475.37	18864.5
1476.86	9673.59	1476.86	14852.8	1476.86	11346.4		1476.86	11513.3	1476.86	14455.5		1476.86	18397.8
1478.35	9622.13	1478.35	14853.2	1478.35	11264.2		1478.35	11563.3	1478.35	14368		1478.35	18170.8
1479.85	9559.7	1479.85	14710.8	1479.85	11079.8		1479.85	11336.7	1479.85	14210.2		1479.85	17808
1481.34	9493.93	1481.34	14675	1481.34	11043.6		1481.34	11346.4	1481.34	14154.5		1481.34	17608.5
1482.83	9416.97	1482.83	14406.2	1482.83	10823.4		1482.83	11090.4	1482.83	13932.5		1482.83	17146.8
1484.32	9300.04	1484.32	14281.6	1484.32	10663.8		1484.32	10964	1484.32	13822.2		1484.32	16829.5
1485.81	9225.45	1485.81	14246.8	1485.81	10564		1485.81	10809.2	1485.81	13766.8		1485.81	16566
1487.3	9180.43	1487.3	14172.2	1487.3	10517.5		1487.3	10749.2	1487.3	13663.2		1487.3	16300.2
1488.79	9078.17	1488.79	14001.8	1488.79	10315		1488.79	10624	1488.79	13512.2		1488.79	15953.8
1490.28	8983.31	1490.28	14021.5	1490.28	10242.1		1490.28	10634.2	1490.28	13443		1490.28	15668.8
1491.77	8962.92	1491.77	13911.8	1491.77	10122.4		1491.77	10586.8	1491.77	13377.7		1491.77	15532.5
1493.26	8898.02	1493.26	13889.8	1493.26	10076		1493.26	10496.4	1493.26	13357.5		1493.26	15442.8
1494.75	8927.81	1494.75	13903.5	1494.75	10038.1		1494.75	10547.3	1494.75	13276.2		1494.75	15417.7
1496.23	8938.43	1496.23	13865.2	1496.23	10045.5		1496.23	10470.5	1496.23	13247.8		1496.23	15284.5
1497.72	8929.18	1497.72	13788.6	1497.72	9980.68		1497.72	10369	1497.72	13230.5		1497.72	15215.2
1499.21	8874.47	1499.21	13805.5	1499.21	9956.75		1499.21	10402.3	1499.21	13249.8		1499.21	15211.5
1500.7	8887.42	1500.7	13809.1	1500.7	9972.68		1500.7	10385.1	1500.7	13226.7		1500.7	15165
1502.19	8838.97	1502.19	13728.3	1502.19	9915.19		1502.19	10385.6	1502.19	13152		1502.19	15074
1503.67	8893.52	1503.67	13810.3	1503.67	10036.5		1503.67	10427	1503.67	13223		1503.67	15170.3
1505.16	8826.43	1505.16	13791.2	1505.16	9965.22		1505.16	10399.1	1505.16	13177.2		1505.16	15184
1506.64	8819.04	1506.64	13752	1506.64	9945.05		1506.64	10383.8	1506.64	13203		1506.64	15197.2
1508.13	8864.81	1508.13	13896.5	1508.13	9930.87		1508.13	10489.1	1508.13	13233.8		1508.13	15276.2
1509.62	8896.17	1509.62	13803.2	1509.62	9990.25		1509.62	10381.5	1509.62	13285.5		1509.62	15279.3
1511.1	8812.79	1511.1	13837.2	1511.1	9938.18		1511.1	10422.7	1511.1	13250.2		1511.1	15283.5
1512.59	8908.88	1512.59	13731.1	1512.59	9957.78		1512.59	10323.6	1512.59	13213		1512.59	15227.5
1514.07	8832.59	1514.07	13818.8	1514.07	9944.72		1514.07	10362.3	1514.07	13253.2		1514.07	15261.8
1515.56	8809.25	1515.56	13753.5	1515.56	9935.46		1515.56	10362.4	1515.56	13193.5		1515.56	15116
1517.04	8745.22	1517.04	13672.2	1517.04	9803.5		1517.04	10308.1	1517.04	13078.2		1517.04	15014
1518.53	8807.68	1518.53	13640.2	1518.53	9878.44		1518.53	10317	1518.53	13002.2		1518.53	14887.5
1520.01	8754.45	1520.01	13623.8	1520.01	9767.22		1520.01	10282	1520.01	13075		1520.01	14863.8
1521.49	8705.26	1521.49	13576.8	1521.49	9796.72		1521.49	10233	1521.49	13060.2		1521.49	14843.8
1522.98	8708.09	1522.98	13650.5	1522.98	9848.39		1522.98	10232	1522.98	13043.5		1522.98	14830.5
1524.46	8770.04	1524.46	13600	1524.46	9828		1524.46	10208.4	1524.46	12947		1524.46	14807.8
1525.94	8681.81	1525.94	13629.8	1525.94	9792.25		1525.94	10197.8	1525.94	13024.2		1525.94	14800.8
1527.42	8727.75	1527.42	13544.1	1527.42	9740.12		1527.42	10247.4	1527.42	12938		1527.42	14740
1528.91	8742.79	1528.91	13592.1	1528.91	9767.94		1528.91	10226.2	1528.91	13034.5		1528.91	14751.8
1530.39	8712.72	1530.39	13627.2	1530.39	9666.37		1530.39	10158.9	1530.39	12914.5		1530.39	14735.7
1531.87	8631.84	1531.87	13552	1531.87	9803.53		1531.87	10184.5	1531.87	13029.2		1531.87	14778
1533.35	8725.2	1533.35	13624.8	1533.35	9734.87		1533.35	10259	1533.35	12981.2		1533.35	14691.8
1534.83	8656.42	1534.83	13551.2	1534.83	9711.37		1534.83	10168.2	1534.83	12935		1534.83	14702.8
1536.31	8652.09	1536.31	13496.1	1536.31	9741.28		1536.31	10176.2	1536.31	12890.8		1536.31	14636.2
1537.79	8668.7	1537.79	13569.2	1537.79	9717.71		1537.79	10203.5	1537.79	13033		1537.79	14763.2
1539.27	8706.67	1539.27	13622.5	1539.27	9767.46		1539.27	10225.6	1539.27	12999		1539.27	14770.5
1540.75	8593.67	1540.75	13460	1540.75	9671.19		1540.75	10127.2	1540.75	12906.7		1540.75	14528.3
1542.23	8642.93	1542.23	13532.2	1542.23	9722.12		1542.23	10135.9	1542.23	12896.2		1542.23	14636.8
1543.71	8649.31	1543.71	13514.5	1543.71	9699.18		1543.71	10175.2	1543.71	12884.8		1543.71	14653
1545.19	8708.02	1545.19	13616.2	1545.19	9735.25		1545.19	10218	1545.19	12944.2		1545.19	14723.5
1546.66	8615.88	1546.66	13501.5	1546.66	9648.25		1546.66	10127.3	1546.66	12856		1546.66	14624.2
1548.14	8612.84	1548.14	13550.8	1548.14	9727.44		1548.14	10158	1548.14	12970.5		1548.14	14627.5
1549.62	8670.93	1549.62	13562.5	1549.62	9747.03		1549.62	10126.3	1549.62	12981.2		1549.62	14761
1551.1	8622.43	1551.1	13546.8	1551.1	9666.72		1551.1	10162.1	1551.1	12928.7		1551.1	14612.2
1552.57	8705.67	1552.57	13529.2	1552.57	9720.03		1552.57	10164.6	1552.57	12957.2		1552.57	14700.2
1554.05	8729.68	1554.05	13577	1554.05	9781.75		1554.05	10218.5	1554.05	13059.5		1554.05	14757.3
1555.53	8657.79	1555.53	13531.1	1555.53	9722.37		1555.53	10233.5	1555.53	12948.2		1555.53	14681.5
1557	8658.52	1557	13542.8	1557	9759.21		1557	10154.9	1557	12973.5		1557	14709.2
1558.48	8613.02	1558.48	13543.8	1558.48	9653.62		1558.48	10124.8	1558.48	12892.5		1558.48	14630
1559.96	8671.93	1559.96	13538.3	1559.96	9750		1559.96	10237.3	1559.96	12940.2		1559.96	14766.2
1561.43	8666.2	1561.43	13592.8	1561.43	9732.19		1561.43	10147.2	1561.43	12924		1561.43	14771.5
1562.91	8624.81	1562.91	13546.5	1562.91	9691.78		1562.91	10276.8	1562.91	12977.2		1562.91	14846.2
1564.38	8674.93	1564.38	13574	1564.38	9726.78		1564.38	10220.5	1564.38	12926.7		1564.38	14832.2
1565.86	8705.06	1565.86	13610.5	1565.86	9739.72		1565.86	10283.9	1565.86	12935.2		1565.86	14888
1567.33	8755.02	1567.33	13667.2	1567.33	9875.03		1567.33	10235.2	1567.33	13001		1567.33	14966
1568.81	8722.7	1568.81	13608.6	1568.81	9808.28		1568.81	10329.9	1568.81	13151		1568.81	15004.8
1570.28	8734.34	1570.28	13709	1570.28	9923.37		1570.28	10341.6	1570.28	13147		1570.28	15083.2
1571.75	8800.34	1571.75	13753	1571.75	9983.25		1571.75	10452	1571.75	13115		1571.75	15281.5
1573.23	8922	1573.23	13769	1573.23	9961.18		1573.23	10477.2	1573.23	13255.5		1573.23	15391.8
1574.7	8890.92	1574.7	13806.5	1574.7	10086.6		1574.7	10489.5	1574.7	13322		1574.7	15721.5
1576.17	8954.67	1576.17	13884.1	1576.17	10227.9		1576.17	10630.8	1576.17	13398.8		1576.17	15996
1577.64	9088.09	1577.64	14024.8	1577.64	10333.2		1577.64	10733	1577.64	13517.7		1577.64	16346.8
1579.12	9165.93	1579.12	14134.1	1579.12	10532.1		1579.12	10882.9	1579.12	13654.2		1579.12	16667.8
1580.59	9203.18	1580.59	14217.1	1580.59	10537.8		1580.59	10938.3	1580.59	13630.2		1580.59	16827.2
1582.06	9191	1582.06	14203.8	1582.06	10540.2		1582.06	10949.2	1582.06	13642.5		1582.06	16812.3
1583.53	9208.72	1583.53	14153.3	1583.53	10493.2		1583.53	10944	1583.53	13708.7		1583.53	16751.8
1585	9029.67	1585	14064.9	1585	10406		1585	10786.2	1585	13537.7		1585	16477.5
1586.47	8983.52	1586.47	13998.8	1586.47	10261.8		1586.47	10665.5	1586.47	13388.5		1586.47	16124.2
1587.94	8967.56	1587.94	13894.3	1587.94	10221.6		1587.94	10663.5	1587.94	13410.5		1587.94	15990
1589.41	8980.68	1589.41	14001	1589.41	10200.9		1589.41	10577	1589.41	13342.8		1589.41	16000.8
1590.88	9001.43	1590.88	13969.3	1590.88	10298.1		1590.88	10660.4	1590.88	13470		1590.88	16114.2
1592.35	9134.95	1592.35	14132	1592.35	10386		1592.35	10758.7	1592.35	13552		1592.35	16417.5
1593.82	9141.68	1593.82	14182.2	1593.82	10525.4		1593.82	10876.9	1593.82	13615.5		1593.82	16765.2
1595.29	9349.04	1595.29	14387	1595.29	10749		1595.29	11124	1595.29	13796.5		1595.29	17314.2
1596.76	9498.17	1596.76	14620.8	1596.76	10980.5		1596.76	11340.2	1596.76	14163.2		1596.76	17876.3
1598.23	9758.56	1598.23	14982.8	1598.23	11384		1598.23	11725.1	1598.23	14523.2		1598.23	18837.2
1599.69	9990.2	1599.69	15290.5	1599.69	11775.8		1599.69	12082.8	1599.69	14795.5		1599.69	19776.2
1601.16	10134.4	1601.16	15559.5	1601.16	12104.8		1601.16	12421.1	1601.16	15147.2		1601.16	20861.2
1602.63	10510.1	1602.63	16021.5	1602.63	12673.3		1602.63	12870.2	1602.63	15611.2		1602.63	22258.3
1604.09	10933.9	1604.09	16463.5	1604.09	13282.8		1604.09	13511	1604.09	16226.8		1604.09	23902.3
1605.56	11399.4	1605.56	17096.8	1605.56	13997.9		1605.56	14110.6	1605.56	16923		1605.56	25789
1607.03	11621.1	1607.03	17581.8	1607.03	14479.5		1607.03	14637.9	1607.03	17361.5		1607.03	27140.8
1608.49	11755.9	1608.49	17652.2	1608.49	14569.2		1608.49	14800	1608.49	17444.5		1608.49	27638
1609.96	11841	1609.96	17811.2	1609.96	14733.7		1609.96	14895	1609.96	17672.5		1609.96	28047.5
1611.43	11580.3	1611.43	17496.5	1611.43	14313.9		1611.43	14550.2	1611.43	17254		1611.43	27122.2
1612.89	11284.9	1612.89	17170	1612.89	13948		1612.89	14171.6	1612.89	16969		1612.89	26092
1614.36	10942.2	1614.36	16778.5	1614.36	13437.4		1614.36	13671.9	1614.36	16488.5		1614.36	24655.5
1615.82	10636.5	1615.82	16365	1615.82	12803.4		1615.82	13123.9	1615.82	16069		1615.82	23292.5
1617.29	10260.4	1617.29	15796.5	1617.29	12200.7		1617.29	12681	1617.29	15478		1617.29	21498.5
1618.75	9930.7	1618.75	15314	1618.75	11768.8		1618.75	12064.6	1618.75	14872.7		1618.75	20294.8
1620.21	9669.31	1620.21	14819.5	1620.21	11234.8		1620.21	11594.1	1620.21	14412.2		1620.21	19094
1621.68	9389.45	1621.68	14680.2	1621.68	10955.4		1621.68	11338.7	1621.68	14172.2		1621.68	18152.2
1623.14	9326.56	1623.14	14413.3	1623.14	10715.6		1623.14	11196.1	1623.14	13996.5		1623.14	17552
1624.6	9164.56	1624.6	14215.6	1624.6	10486		1624.6	11005.1	1624.6	13730.2		1624.6	17026
1626.07	9101.2	1626.07	14181.5	1626.07	10415.9		1626.07	10862.5	1626.07	13583.5		1626.07	16678.5
1627.53	8959.49	1627.53	13985.3	1627.53	10229.7		1627.53	10690	1627.53	13457.2		1627.53	16222.5
1628.99	9061.66	1628.99	14021.5	1628.99	10158.6		1628.99	10666.7	1628.99	13420.2		1628.99	16025
1630.45	8947.56	1630.45	13852	1630.45	10146.2		1630.45	10542.8	1630.45	13252		1630.45	15843.5
1631.91	8876.06	1631.91	13844.8	1631.91	10035.6		1631.91	10487.1	1631.91	13237.2		1631.91	15719.2
1633.38	8839.92	1633.38	13809.5	1633.38	9972.69		1633.38	10434	1633.38	13227		1633.38	15513.2
1634.84	8825.72	1634.84	13693.5	1634.84	10045.3		1634.84	10375.3	1634.84	13140.5		1634.84	15444
1636.3	8812.04	1636.3	13690	1636.3	9931.72		1636.3	10418.5	1636.3	13164		1636.3	15335
1637.76	8808.59	1637.76	13817.2	1637.76	9923.25		1637.76	10300.1	1637.76	13150.5		1637.76	15341.5
1639.22	8817.7	1639.22	13897.2	1639.22	9972.87		1639.22	10471.5	1639.22	13192		1639.22	15415
1640.68	8829.47	1640.68	13839.8	1640.68	10014.5		1640.68	10376.3	1640.68	13251.2		1640.68	15318
1642.14	8930.97	1642.14	13959.8	1642.14	9984.12		1642.14	10367.9	1642.14	13285.2		1642.14	15327
1643.6	9149.66	1643.6	14188.2	1643.6	10242.1		1643.6	10671.4	1643.6	13583.8		1643.6	15642.8
1645.06	9206.22	1645.06	14363.2	1645.06	10338.8		1645.06	10805.4	1645.06	13684.5		1645.06	15748.5
1646.51	8941.18	1646.51	13939	1646.51	10057		1646.51	10450.8	1646.51	13251.7		1646.51	15307.5
1647.97	8827.7	1647.97	13789.8	1647.97	9953.43		1647.97	10326.3	1647.97	13162		1647.97	15197.2
1649.43	8814.97	1649.43	13796.8	1649.43	9991		1649.43	10366.9	1649.43	13163.2		1649.43	15238.5
1650.89	8864.45	1650.89	13819.2	1650.89	9906.69		1650.89	10389.5	1650.89	13185.2		1650.89	15134.5
1652.35	8777.47	1652.35	13714	1652.35	9854.25		1652.35	10304.1	1652.35	13128.2		1652.35	15084.2
1653.8	8786.84	1653.8	13668.3	1653.8	9858.08		1653.8	10240.5	1653.8	13065.2		1653.8	15056.8
1655.26	8796.74	1655.26	13715.2	1655.26	9864.44		1655.26	10306.8	1655.26	13069		1655.26	15080.2
1656.72	8733.5	1656.72	13605.1	1656.72	9837		1656.72	10257.9	1656.72	13032.2		1656.72	14996.5
1658.17	8680.84	1658.17	13638.6	1658.17	9784.43		1658.17	10270.5	1658.17	12994		1658.17	14959
1659.63	8757.93	1659.63	13795.2	1659.63	9851.3		1659.63	10281.7	1659.63	13112.8		1659.63	15004.2
1661.09	8731.52	1661.09	13628	1661.09	9747.19		1661.09	10210.4	1661.09	12950.7		1661.09	14900.8
1662.54	8753.52	1662.54	13618.5	1662.54	9897.62		1662.54	10314.8	1662.54	13107.2		1662.54	14990.8
1664	8748.84	1664	13613	1664	9730.87		1664	10226.8	1664	12987.5		1664	14814.8
1665.45	8800.79	1665.45	13700.5	1665.45	9917.78		1665.45	10322.8	1665.45	13077.2		1665.45	14959
1666.9	8949.6	1666.9	13889.6	1666.9	9962.78		1666.9	10402.9	1666.9	13310.2		1666.9	15173.5
1668.36	8762.52	1668.36	13807.5	1668.36	9877		1668.36	10341.6	1668.36	13097.2		1668.36	14927.5
1669.81	8853.93	1669.81	13841	1669.81	9942.62		1669.81	10455.5	1669.81	13245.5		1669.81	14995
1671.27	8786.09	1671.27	13672.8	1671.27	9897.5		1671.27	10201	1671.27	13085.8		1671.27	14840.5
1672.72	8790.06	1672.72	13829	1672.72	9898		1672.72	10253.2	1672.72	13108.5		1672.72	14789.8
1674.17	8833.59	1674.17	13802.8	1674.17	9927.25		1674.17	10331.6	1674.17	13220.8		1674.17	15027.5
1675.63	8900.68	1675.63	13815.8	1675.63	9975.78		1675.63	10321.8	1675.63	13157		1675.63	14996.8
1677.08	8751.38	1677.08	13640.2	1677.08	9813.75		1677.08	10237.3	1677.08	13102.5		1677.08	14815.8
1678.53	8657.2	1678.53	13468.5	1678.53	9692.12		1678.53	10079	1678.53	12868		1678.53	14560.3
1679.98	8676.66	1679.98	13526.2	1679.98	9782.75		1679.98	10163.2	1679.98	12928.8		1679.98	14620.5
1681.44	8596.52	1681.44	13483.3	1681.44	9680.56		1681.44	10041.1	1681.44	12849.5		1681.44	14562.2
1682.89	8788.02	1682.89	13683.1	1682.89	9823.14		1682.89	10233	1682.89	13081.5		1682.89	14769.2
1684.34	8796.02	1684.34	13684.2	1684.34	9784.37		1684.34	10260.2	1684.34	13079		1684.34	14787.1
1685.79	8790.31	1685.79	13636	1685.79	9784.87		1685.79	10227.5	1685.79	13017.7		1685.79	14687
1687.24	8750.18	1687.24	13700.2	1687.24	9859.94		1687.24	10261.2	1687.24	13060.7		1687.24	14796.5
1688.69	8675.02	1688.69	13554.8	1688.69	9752.19		1688.69	10157.1	1688.69	12931.7		1688.69	14523
1690.14	8698.02	1690.14	13677.5	1690.14	9726.94		1690.14	10171.5	1690.14	13045.2		1690.14	14618.8
1691.59	8709.26	1691.59	13571.8	1691.59	9690.37		1691.59	10050.3	1691.59	12954.8		1691.59	14458
1693.04	8570.95	1693.04	13455.5	1693.04	9615.22		1693.04	10032.8	1693.04	12781.2		1693.04	14380.5
1694.49	8589.63	1694.49	13516	1694.49	9653.19		1694.49	10111.5	1694.49	12814		1694.49	14559.8
1695.94	8713.02	1695.94	13577	1695.94	9719.44		1695.94	10191.3	1695.94	12949.5		1695.94	14574
1697.39	8629.45	1697.39	13494.8	1697.39	9681		1697.39	10060.9	1697.39	12833		1697.39	14369.8
1698.83	8629.84	1698.83	13463.1	1698.83	9618.78		1698.83	9997.39	1698.83	12796.2		1698.83	14454.8
1700.28	8518.52	1700.28	13378.5	1700.28	9513.22		1700.28	9983.25	1700.28	12779		1700.28	14303.2
1701.73	8560.29	1701.73	13370.3	1701.73	9543.03		1701.73	9977.06	1701.73	12795.2		1701.73	14323.2
1703.18	8615.92	1703.18	13473.8	1703.18	9615.14		1703.18	10024.9	1703.18	12718		1703.18	14394.8
1704.63	8551.67	1704.63	13370.1	1704.63	9563.69		1704.63	9993.29	1704.63	12743.2		1704.63	14366.2
1706.07	8588.97	1706.07	13293.2	1706.07	9540.62		1706.07	9981.25	1706.07	12717.8		1706.07	14292
1707.52	8569.18	1707.52	13398.8	1707.52	9563.44		1707.52	9995.5	1707.52	12784.2		1707.52	14321.8
1708.96	8561.43	1708.96	13295.5	1708.96	9505.75		1708.96	9993.21	1708.96	12749.8		1708.96	14309
1710.41	8545.56	1710.41	13302.6	1710.41	9541.69		1710.41	10043.1	1710.41	12755.5		1710.41	14213.3
1711.86	8579.47	1711.86	13364.8	1711.86	9574.5		1711.86	10007	1711.86	12803.7		1711.86	14310.8
1713.3	8550.68	1713.3	13294.3	1713.3	9605.25		1713.3	9946	1713.3	12745.8		1713.3	14201.8
1714.75	8558.92	1714.75	13348.5	1714.75	9554.89		1714.75	9932.06	1714.75	12659.5		1714.75	14293.2
1716.19	8493.63	1716.19	13333.2	1716.19	9530		1716.19	9985.81	1716.19	12657.2		1716.19	14182
1717.64	8579.6	1717.64	13290.8	1717.64	9566.94		1717.64	10010.8	1717.64	12656.2		1717.64	14314
1719.08	8480.43	1719.08	13279.1	1719.08	9553		1719.08	9986.79	1719.08	12683.5		1719.08	14264
1720.53	8509.56	1720.53	13280.3	1720.53	9520		1720.53	9935.56	1720.53	12644.7		1720.53	14257.8
1721.97	8486.49	1721.97	13277.2	1721.97	9523.87		1721.97	9951.64	1721.97	12618.5		1721.97	14262.2
1723.41	8516.45	1723.41	13289.5	1723.41	9553.78		1723.41	9984.75	1723.41	12726.2		1723.41	14248.8
1724.86	8506.52	1724.86	13187	1724.86	9462.22		1724.86	9888.25	1724.86	12628.2		1724.86	14161
1726.3	8510.06	1726.3	13234.2	1726.3	9499.03		1726.3	9896.06	1726.3	12582.5		1726.3	14263.8
1727.74	8468.2	1727.74	13185.8	1727.74	9414.94		1727.74	9861	1727.74	12565.5		1727.74	14167.8
1729.18	8502.52	1729.18	13260.2	1729.18	9511.19		1729.18	9922	1729.18	12671		1729.18	14210.5
1730.62	8483.81	1730.62	13196.5	1730.62	9500.55		1730.62	9961.54	1730.62	12579.8		1730.62	14160.8
1732.07	8468.7	1732.07	13236.8	1732.07	9487.53		1732.07	9936.79	1732.07	12675		1732.07	14215.5
1733.51	8466.22	1733.51	13199.5	1733.51	9485.87		1733.51	9850.9	1733.51	12536.7		1733.51	14135.8
1734.95	8475.34	1734.95	13223	1734.95	9520.55		1734.95	9897	1734.95	12652.8		1734.95	14149.2
1736.39	8489.95	1736.39	13221.8	1736.39	9495.19		1736.39	9917.25	1736.39	12656.7		1736.39	14204.2
1737.83	8537.68	1737.83	13320	1737.83	9509.69		1737.83	9902.75	1737.83	12619.5		1737.83	14164
1739.27	8492.02	1739.27	13250	1739.27	9488.75		1739.27	9944.56	1739.27	12632.8		1739.27	14173.3
1740.71	8453.92	1740.71	13129.6	1740.71	9423.22		1740.71	9828.54	1740.71	12508.8		1740.71	14063.8
1742.15	8499.75	1742.15	13299.5	1742.15	9501		1742.15	9934.25	1742.15	12628.5		1742.15	14172
1743.59	8510.47	1743.59	13233.2	1743.59	9489.3		1743.59	9922.31	1743.59	12671.2		1743.59	14122
1745.03	8490.43	1745.03	13118.1	1745.03	9437.69		1745.03	9879.75	1745.03	12651.5		1745.03	14140.2
1746.47	8468.67	1746.47	13241.1	1746.47	9468		1746.47	10008	1746.47	12634		1746.47	14094
1747.91	8474.06	1747.91	13170.5	1747.91	9403.37		1747.91	9807.64	1747.91	12573.5		1747.91	14114.8
1749.35	8460.51	1749.35	13119.8	1749.35	9424.87		1749.35	9837.54	1749.35	12587.5		1749.35	14084.5
1750.78	8399.2	1750.78	13179	1750.78	9505.12		1750.78	9840.19	1750.78	12541		1750.78	14118.5
1752.22	8438.74	1752.22	13257.8	1752.22	9409.62		1752.22	9885.29	1752.22	12558.7		1752.22	14132.8
1753.66	8480.52	1753.66	13235.3	1753.66	9451.55		1753.66	9870.5	1753.66	12533.7		1753.66	14085.8
1755.1	8409.92	1755.1	13135.8	1755.1	9421.28		1755.1	9814.25	1755.1	12483.7		1755.1	13962
1756.53	8388.2	1756.53	13252	1756.53	9401.62		1756.53	9885.65	1756.53	12527.2		1756.53	14100
1757.97	8426.18	1757.97	13113.5	1757.97	9457.75		1757.97	9824.75	1757.97	12464		1757.97	14038
1759.41	8435.68	1759.41	13210.5	1759.41	9424.75		1759.41	9853.39	1759.41	12571.8		1759.41	14154.5
1760.84	8413.24	1760.84	13138.6	1760.84	9442.37		1760.84	9879.64	1760.84	12607.5		1760.84	14144.8
1762.28	8469.5	1762.28	13168.2	1762.28	9491.25		1762.28	9859.31	1762.28	12611.5		1762.28	14179.8
1763.71	8383.42	1763.71	13143.5	1763.71	9406.19		1763.71	9807.39	1763.71	12486.2		1763.71	13995
1765.15	8432.95	1765.15	13206	1765.15	9455.18		1765.15	9789.56	1765.15	12571.5		1765.15	14065
1766.58	8414.7	1766.58	13174.2	1766.58	9434.22		1766.58	9892.19	1766.58	12542.2		1766.58	14078.2
1768.02	8382.93	1768.02	13115.6	1768.02	9369.8		1768.02	9808.25	1768.02	12439.5		1768.02	13992.2
1769.45	8451.99	1769.45	13167.6	1769.45	9412.69		1769.45	9841.64	1769.45	12561		1769.45	14013.8
1770.89	8417.59	1770.89	13220.3	1770.89	9493.87		1770.89	9887.79	1770.89	12626		1770.89	14120.5
1772.32	8345.7	1772.32	13075.2	1772.32	9346		1772.32	9749.79	1772.32	12465.8		1772.32	13997
1773.75	8431.16	1773.75	13085.5	1773.75	9417.55		1773.75	9767.19	1773.75	12465.5		1773.75	14022.8
